# Supplementary material for: Cohort profile: BIOVASC-late, a prospective multicentred study of imaging and blood biomarkers of carotid plaque inflammation and risk of late vascular recurrence after non-severe stroke in Ireland
Source: PubMed Central journal article supplement — BMJ Open. 2020 Jul 19;10(7):e038607. doi: 10.1136/bmjopen-2020-038607 (PMC7371237; doi:10.1136/bmjopen-2020-038607), 2020-07-19
Supplement: bmjopen-2020-038607.draft_revisions.pdf [file bmjopen-2020-038607.draft_revisions.pdf]

# BMJ Open

BMJ Open is committed to open peer review. As part of this commitment we make the peer review history of every article we publish publicly available.

When an article is published we post the peer reviewers' comments and the authors' responses online. We also post the versions of the paper that were used during peer review. These are the versions that the peer review comments apply to.

The versions of the paper that follow are the versions that were submitted during the peer review process. They are not the versions of record or the final published versions. They should not be cited or distributed as the published version of this manuscript.

BMJ Open is an open access journal and the full, final, typeset and author-corrected version of record of the manuscript is available on our site with no access controls, subscription charges or pay-per-view fees (<http://bmjopen.bmj.com>).

If you have any questions on BMJ Open's open peer review process please email [info.bmjopen@bmj.com](mailto:info.bmjopen@bmj.com)

# BMJ Open

## Cohort profile: BIOVASC-Late, A Prospective Multi-Centred Study of Imaging and Blood Biomarkers of Carotid Plaque Inflammation and Risk of Late Vascular Recurrence after Non-severe Stroke in Ireland.

|                               |                                                                                                                                                                                                                                                                                                                                                                                                                                                                                                                                                                                                                                                                                                                                                                                                                                                                                                                                                                                                                                                                                                                                                                                                                                                                                                                                                                                                                                                                                                                                                                                                                                                                                                                                                                                                                                                                                                                                                                                                                                                                                                                                                                                                                                |
|-------------------------------|--------------------------------------------------------------------------------------------------------------------------------------------------------------------------------------------------------------------------------------------------------------------------------------------------------------------------------------------------------------------------------------------------------------------------------------------------------------------------------------------------------------------------------------------------------------------------------------------------------------------------------------------------------------------------------------------------------------------------------------------------------------------------------------------------------------------------------------------------------------------------------------------------------------------------------------------------------------------------------------------------------------------------------------------------------------------------------------------------------------------------------------------------------------------------------------------------------------------------------------------------------------------------------------------------------------------------------------------------------------------------------------------------------------------------------------------------------------------------------------------------------------------------------------------------------------------------------------------------------------------------------------------------------------------------------------------------------------------------------------------------------------------------------------------------------------------------------------------------------------------------------------------------------------------------------------------------------------------------------------------------------------------------------------------------------------------------------------------------------------------------------------------------------------------------------------------------------------------------------|
| Journal:                      | <i>BMJ Open</i>                                                                                                                                                                                                                                                                                                                                                                                                                                                                                                                                                                                                                                                                                                                                                                                                                                                                                                                                                                                                                                                                                                                                                                                                                                                                                                                                                                                                                                                                                                                                                                                                                                                                                                                                                                                                                                                                                                                                                                                                                                                                                                                                                                                                                |
| Manuscript ID                 | bmjopen-2020-038607                                                                                                                                                                                                                                                                                                                                                                                                                                                                                                                                                                                                                                                                                                                                                                                                                                                                                                                                                                                                                                                                                                                                                                                                                                                                                                                                                                                                                                                                                                                                                                                                                                                                                                                                                                                                                                                                                                                                                                                                                                                                                                                                                                                                            |
| Article Type:                 | Cohort profile                                                                                                                                                                                                                                                                                                                                                                                                                                                                                                                                                                                                                                                                                                                                                                                                                                                                                                                                                                                                                                                                                                                                                                                                                                                                                                                                                                                                                                                                                                                                                                                                                                                                                                                                                                                                                                                                                                                                                                                                                                                                                                                                                                                                                 |
| Date Submitted by the Author: | 17-Mar-2020                                                                                                                                                                                                                                                                                                                                                                                                                                                                                                                                                                                                                                                                                                                                                                                                                                                                                                                                                                                                                                                                                                                                                                                                                                                                                                                                                                                                                                                                                                                                                                                                                                                                                                                                                                                                                                                                                                                                                                                                                                                                                                                                                                                                                    |
| Complete List of Authors:     | <p>McCabe, John; University College Dublin, Stroke Clinical Trials Network Ireland</p> <p>Giannotti, Nicola; University College Dublin, Radiography &amp; Diagnostic Imaging, School of Medicine</p> <p>McNulty, Jonathan; University College Dublin, Radiography &amp; Diagnostic Imaging, School of Medicine, University College Dublin, Ireland.</p> <p>Collins, Sean; Health Research Board Stroke Clinical Trials Network Ireland (HRB SCTNI)</p> <p>Coveney, Sarah; Health Research Board Stroke Clinical Trials Network Ireland (HRB SCTNI); Mater Misericordiae University Hospital, Neurovascular Clinical Science Unit, Stroke Service and Department of Neurology</p> <p>Murphy, Sean; Health Research Board Stroke Clinical Trials Network Ireland (HRB SCTNI); Mater Misericordiae University Hospital, Neurovascular Clinical Science Unit, Stroke Service and Department of Neurology</p> <p>Barry, Mary; St Vincent's University Hospital, Vascular Surgery</p> <p>Harbison, Joseph; St James Hospital; Health Research Board Stroke Clinical Trials Network Ireland (HRB SCTNI)</p> <p>Cronin, Simon; Health Research Board Stroke Clinical Trials Network Ireland (HRB SCTNI); Cork University Hospital Group, Department of Neurology</p> <p>Williams, David; Health Research Board Stroke Clinical Trials Network Ireland (HRB SCTNI); Beaumont Hospital, Department of Stroke</p> <p>Horgan, Gillian; Health Research Board Stroke Clinical Trials Network Ireland (HRB SCTNI); Mater Misericordiae University Hospital, Neurovascular Clinical Science Unit, Stroke Service and Department of Neurology</p> <p>Dolan, Eamon; Health Research Board Stroke Clinical Trials Network Ireland (HRB SCTNI); James Connolly Memorial Hospital, Department of Geriatric Medicine</p> <p>Cassidy, Tim; St Vincent's University Hospital, Geriatric Medicine; Health Research Board Stroke Clinical Trials Network Ireland (HRB SCTNI)</p> <p>McDonnell, Ciaran; Mater Misericordiae University Hospital, Department of Vascular Surgery</p> <p>Kavanagh, Eoin; Mater Misericordiae University Hospital, Department of Radiology</p> <p>Foley, Shane; University College Dublin, Radiography &amp; Diagnostic</p> |

1  
2  
3  
4  
5  
6  
7  
8  
9  
10  
11  
12  
13  
14  
15  
16  
17  
18  
19  
20  
21  
22  
23  
24  
25  
26  
27  
28  
29  
30  
31  
32  
33  
34  
35  
36  
37  
38  
39  
40  
41  
42  
43  
44  
45  
46  
47  
48  
49  
50  
51  
52  
53  
54  
55  
56  
57  
58  
59  
60

|           |                                                                                                                                                                                                                                                                                                                                                                                                                                                                                                                                                          |
|-----------|----------------------------------------------------------------------------------------------------------------------------------------------------------------------------------------------------------------------------------------------------------------------------------------------------------------------------------------------------------------------------------------------------------------------------------------------------------------------------------------------------------------------------------------------------------|
|           | Imaging, School of Medicine<br>O'Connell, Martin; Mater Misericordiae University Hospital, Department of Radiology<br>Marnane, Michael; Mater Misericordiae University Hospital, Stroke Clinical Trials Network Ireland; University College Dublin, Neurovascular Clinical Science Unit, Stroke Service and Department of Neurology<br>Kelly, Peter ; Health Research Board Stroke Clinical Trials Network Ireland (HRB SCTNI); Mater Misericordiae University Hospital, Neurovascular Clinical Science Unit, Stroke Service and Department of Neurology |
| Keywords: | Stroke < NEUROLOGY, Cardiovascular imaging < RADIOLOGY & IMAGING, PREVENTIVE MEDICINE                                                                                                                                                                                                                                                                                                                                                                                                                                                                    |
|           |                                                                                                                                                                                                                                                                                                                                                                                                                                                                                                                                                          |

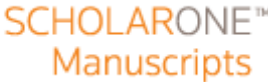

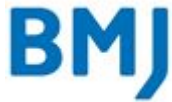

I, the Submitting Author has the right to grant and does grant on behalf of all authors of the Work (as defined in the below author licence), an exclusive licence and/or a non-exclusive licence for contributions from authors who are: i) UK Crown employees; ii) where BMJ has agreed a CC-BY licence shall apply, and/or iii) in accordance with the terms applicable for US Federal Government officers or employees acting as part of their official duties; on a worldwide, perpetual, irrevocable, royalty-free basis to BMJ Publishing Group Ltd ("BMJ") its licensees and where the relevant Journal is co-owned by BMJ to the co-owners of the Journal, to publish the Work in this journal and any other BMJ products and to exploit all rights, as set out in our [licence](#).

The Submitting Author accepts and understands that any supply made under these terms is made by BMJ to the Submitting Author unless you are acting as an employee on behalf of your employer or a postgraduate student of an affiliated institution which is paying any applicable article publishing charge ("APC") for Open Access articles. Where the Submitting Author wishes to make the Work available on an Open Access basis (and intends to pay the relevant APC), the terms of reuse of such Open Access shall be governed by a Creative Commons licence – details of these licences and which [Creative Commons](#) licence will apply to this Work are set out in our licence referred to above.

Other than as permitted in any relevant BMJ Author's Self Archiving Policies, I confirm this Work has not been accepted for publication elsewhere, is not being considered for publication elsewhere and does not duplicate material already published. I confirm all authors consent to publication of this Work and authorise the granting of this licence.

**TITLE PAGE**

Cohort profile: BIOVASC-Late, A Prospective Multi-Centred Study of Imaging and Blood Biomarkers of Carotid Plaque Inflammation and Risk of Late Vascular Recurrence after Non-severe Stroke in Ireland

**Authors**

McCabe JJ<sup>1,2</sup>, Giannotti N<sup>3</sup>, McNulty JP<sup>3</sup>, Murphy S<sup>1,2</sup>, Barry M<sup>4</sup>, Cassidy T<sup>1,5</sup>, Cronin S<sup>1,6</sup>, Dolan E<sup>1,7</sup>, Foley S<sup>3</sup>, Harbison J<sup>1,8</sup>, Collins S<sup>1,2</sup>, Coveney S<sup>1,2</sup>, Horgan G<sup>1,2</sup>, Kavanagh E<sup>9</sup>, McDonnell C<sup>10</sup>, Williams DJ<sup>1,11</sup>, O'Connell M<sup>9</sup>, Marnane M<sup>1,2</sup>, Kelly PJ<sup>1,2</sup>.

**Affiliations:**

<sup>1</sup> Health Research Board, Stroke Clinical Trials Network Ireland SCTNI, Dublin, Ireland.

<sup>2</sup> Neurovascular Clinical Science Unit, Stroke Service and Department of Neurology, Mater Misericordiae University Hospital, Dublin, Ireland .

<sup>3</sup> Radiography & Diagnostic Imaging, School of Medicine, University College Dublin, Ireland.

<sup>4</sup> Department of Vascular Surgery, St Vincent's University Hospital, Dublin, Ireland.

<sup>5</sup> Department of Geriatric Medicine, St Vincent's University Hospital, Dublin, Ireland.

<sup>6</sup> Department of Neurology, Cork University Hospital, Ireland and Department of Clinical Neuroscience, College of Medicine and Health, University College Cork, Ireland.

<sup>7</sup> James Connolly Memorial Hospital, Dublin, Ireland.

<sup>8</sup> Stroke Service, Department of Geriatric Medicine, St James' Hospital, Dublin, Ireland.

<sup>9</sup> Department of Radiology, Mater Misericordiae University Hospital and University College Dublin Ireland.

<sup>10</sup> Department of Vascular Surgery, Mater Misericordiae University Hospital, Dublin, Ireland.

<sup>11</sup> Department of Geriatric and Stroke Medicine, Royal College of Surgeons in Ireland/Beaumont Hospital Dublin Ireland.

**Corresponding author:** Dr John McCabe, Health Research Board Stroke Clinical Trials Network Ireland, UCD Clinical Research Centre, Catherine McAuley Centre, Nelson Street, Dublin 7. E-mail: [mccabej1@tcd.ie](mailto:mccabej1@tcd.ie).

1  
2  
3 **Word Count:** 4,239  
4  
5

6 **Keywords:** stroke, transient ischaemic attack, carotid, atherosclerosis, plaque, recurrence,  
7 inflammation, 18-FDG positron-emission tomography.  
8  
9  
10  
11  
12  
13  
14  
15  
16  
17  
18  
19  
20  
21  
22  
23  
24  
25  
26  
27  
28  
29  
30  
31  
32  
33  
34  
35  
36  
37  
38  
39  
40  
41  
42  
43  
44  
45  
46  
47  
48  
49  
50  
51  
52  
53  
54  
55  
56  
57  
58  
59  
60

For peer review only

## ABSTRACT

**Purpose:** Inflammation is important in stroke. Anti-inflammatory therapy reduces vascular events in coronary patients.  $^{18}\text{F}$ -fluorodeoxyglucose positron emission tomography ( $^{18}\text{F}$ -FDG-PET) identifies plaque inflammation-related metabolism. However, long-term prospective cohort studies investigating the association between carotid plaque inflammation, identified on  $^{18}\text{F}$ -FDG PET, and the risk of recurrent vascular events, have not yet been undertaken in stroke patients.

**Participants:** The Biomarkers Imaging Vulnerable Atherosclerosis in Symptomatic Carotid disease (BIOVASC) study and Dublin Carotid Atherosclerosis Study (DUCASS) are 2 prospective multi-centred observational cohort studies, employing near-identical methodologies, which recruited 285 patients between 2008-2016 with non-severe stroke/transient ischaemic attack and ipsilateral carotid stenosis (50-99%). Patients underwent co-registered carotid  $^{18}\text{F}$ -FDG PET/computerised tomography angiography (CTA) and phlebotomy for measurement of inflammatory cytokines. Plaque  $^{18}\text{F}$ -FDG-uptake is expressed as maximum standardized uptake value ( $\text{SUV}_{\text{max}}$ ) and tissue-to-background ratio. The BIOVASC-Late study is a follow-up study (median 7 years) of patients recruited to the DUCASS/BIOVASC cohorts.

**Findings to date:** We have reported that  $^{18}\text{F}$ -FDG-uptake in atherosclerotic plaques of patients with symptomatic carotid stenosis predicts early recurrent stroke, independent of luminal narrowing. The incorporation of  $^{18}\text{F}$ -FDG plaque uptake into a clinical prediction model also improves discrimination of early recurrent stroke, when compared with risk stratification by luminal stenosis alone. However, the relationship between  $^{18}\text{F}$ -FDG-uptake and late vascular events has not been investigated to date.

**Future plans:** The primary aim of BIOVASC-Late is to investigate the association between  $\text{SUV}_{\text{max}}$  in symptomatic 'culprit' carotid plaque (as a marker of systemic inflammatory atherosclerosis) and the composite outcome of any late major vascular event (recurrent ischaemic stroke, coronary event, or vascular death). Secondary aims are to investigate associations between: (i)  $\text{SUV}_{\text{max}}$  in symptomatic plaque, and individual vascular endpoints (ii)  $\text{SUV}_{\text{max}}$  in asymptomatic contralateral carotid plaque and  $\text{SUV}_{\text{max}}$  in ipsilateral symptomatic plaque (iii)  $\text{SUV}_{\text{max}}$  in asymptomatic carotid plaque and major vascular events (iv) inflammatory cytokines and vascular events.

### Strengths and limitations of this study

- BIOVASC and DUCASS are the first observational studies to show that plaque-related inflammation measured by  $^{18}\text{F}$ -FDG PET is associated with early recurrent stroke in patients with recently symptomatic carotid disease, independent of luminal stenosis.
- Incorporation of SUV uptake into a clinical prediction model improves the identification of early recurrent stroke and may improve patient selection for carotid revascularisation.
- BIOVASC-Late is the first study to investigate the prognostic utility of  $^{18}\text{F}$ -FDG PET-CTA for late outcome vascular events in stroke patients.
- Long-term data on the prognostic role of imaging/blood biomarkers of inflammation will help inform the need for future RCTs of anti-inflammatory therapies for secondary prevention in stroke patients.
- Limitations of the study include (i) a fixed sample size, which means that the analyses for some secondary outcomes may be underpowered (ii) limitations to PET-CTA as a plaque-imaging modality, including its limited spatial resolution and inability to identify potentially relevant plaque features (eg. intraplaque hemorrhage or surface ulceration), which have been associated with stroke recurrence.



## INTRODUCTION

Stroke remains a leading cause of death, disability and dementia worldwide.(1) Despite modern secondary prevention therapy, the risk of recurrent major vascular events after ischaemic stroke is in the region of 25-30% over 5 years. (2) There is an urgent and growing need for new therapeutic targets for secondary prevention.

Clinico-pathological studies implicate inflammation in plaque destabilisation and stroke pathogenesis.(3-5) Randomised control trials of anti-inflammatory therapy in patients with coronary disease have recently been shown to reduce the risk of recurrent vascular events. (6-8) The LoDoCO and COLCOT trials have both shown that colchicine reduces the risk of major vascular events in patients with coronary disease.(6, 7) The CANTOS trial also showed that interleukin-1 $\beta$  inhibition with canakinumab reduced the risk of vascular events in patients with stable coronary disease.(8) CONVINCE (COLchicine for preventioN of Vascular Inflammation in Non-Cardioembolic stroke trial) is the first prevention trial to investigate whether anti-inflammatory therapy might reduce the risk of vascular events in stroke patients and recruitment is currently ongoing (ClinicalTrials.gov Identifier: NCT02898610).

However, the prognostic role of inflammatory biomarkers in stroke patients is uncertain. Better data is needed to strengthen the rationale for future prevention trials of anti-inflammatory therapy in stroke survivors. BIOVASC and DUCASS are 2 prospective multi-centred cohort studies of patients with symptomatic carotid disease, which employed near-identical methodologies, and examined the relationship between blood and imaging biomarkers of inflammation and the risk of early recurrent stroke. The BIOVASC-Late study is a late follow-up study (range 3-12 years, median 7 years) of patients recruited to the DUCASS/BIOVASC cohorts.

### **Prognostic role of imaging biomarkers of vascular inflammation**

$^{18}\text{F}$ -FDG PET is a validated technique for non-invasive imaging of inflammation-related plaque metabolism and is associated with histological evidence of inflammation in resected human carotid plaque specimens.(9, 10)  $^{18}\text{F}$ -FDG uptake in one artery is strongly associated with  $^{18}\text{F}$ -FDG uptake in neighbouring arteries, suggesting that plaque inflammation measured

1  
2  
3 by PET might be a surrogate marker of a systemic inflammatory atherosclerotic plaque  
4 burden.(11)  $^{18}\text{F}$ -FDG aortic uptake in patients without a history of vascular disease is  
5 associated with future cardiovascular events independent of other vascular risk factors.(12)  
6  
7 The association between atherosclerotic plaque inflammation measured by  $^{18}\text{F}$ -FDG-PET, in  
8 recently symptomatic stroke patients, and the risk of late major vascular events has heretofore  
9 not been studied.  
10  
11  
12  
13  
14

### 15 **Prognostic role of circulating blood biomarkers of inflammation**

16  
17 Circulating blood biomarkers of inflammation, such as C-reactive Protein (CRP) and  
18 fibrinogen, are both associated with first stroke in patients without a history of vascular  
19 disease.(13-15) However, studies investigating the prognostic role of inflammatory cytokines  
20 in stroke survivors have shown conflicting results and require further investigation. (16-21)  
21  
22 Furthermore, few data exist on the cross-sectional association between circulating  
23 inflammatory cytokines and carotid plaque inflammation-related hypermetabolism (measured  
24 by  $^{18}\text{F}$ -FDG PET) in recently symptomatic stroke patients.  
25  
26  
27  
28  
29  
30

### 31 **Aims**

32  
33 The primary aim of BIOVASC-Late is to investigate the association between  $^{18}\text{F}$ -FDG uptake  
34 in carotid plaques of recently symptomatic ischaemic stroke/transient ischaemic attack (TIA  
35 patients and the risk of any late major cardiovascular event defined as a composite of non-  
36 fatal ischaemic stroke, myocardial infarction (MI), unstable angina requiring hospitalisation,  
37 non-fatal cardiac arrest or vascular death (see Figure 1), occurring 30 days after the index  
38 event.  
39  
40  
41  
42  
43  
44

45 Our secondary aims are:

- 46  
47  
48 • To investigate the association between  $^{18}\text{F}$ -FDG uptake in ipsilateral ('culprit') plaque  
49 in ischaemic stroke/TIA patients and the risk of the individual components of the  
50 primary endpoint.  
51
- 52 • To investigate the cross-sectional association between  $^{18}\text{F}$ -FDG uptake in the  
53 ipsilateral ('culprit') carotid artery of ischaemic stroke/TIA patients and  $^{18}\text{F}$ -FDG  
54 uptake in the contralateral asymptomatic ('non-culprit') carotid artery.  
55  
56  
57  
58  
59  
60

- To investigate the association between  $^{18}\text{F}$ -FDG uptake in the asymptomatic contralateral ('non-culprit') carotid artery and the risk of the composite vascular outcome.
- To investigate the association between inflammatory cytokines measured acutely, at the time of the index event, and the risk of late vascular events.

Exploratory aims will include:

To investigate the associations between:

- Inflammatory cytokines, measured acutely, and  $^{18}\text{F}$ -FDG uptake in ipsilateral symptomatic and contralateral asymptomatic carotid artery.
- Inflammatory cytokines, measured acutely, with levels of inflammatory cytokines measured at late follow-up.
- $^{18}\text{F}$ -FDG uptake in symptomatic 'culprit' carotid plaque in ischaemic stroke/TIA patients and outcome events due peripheral arterial disease.
- $^{18}\text{F}$ -FDG uptake in symptomatic 'culprit' carotid plaque and late-outcome ipsilateral ischaemic stroke.

## COHORT DESCRIPTION

### DUCASS: Eligibility

DUCASS is a multi-centred prospective observational cohort study, which recruited 77 patients from 2008-2012 from 4 centres in Ireland. Inclusion criteria were: (1) recent ( $\leq 14$  days) TIA, non-severe stroke (modified Rankin Scale (mRS)  $\leq 3$ ), or retinal artery embolism; (2) ipsilateral non-occlusive internal carotid stenosis ( $\geq 50\%$  luminal narrowing) identified by duplex ultrasound (confirmed by CTA and/or magnetic resonance angiography (MRA)). Exclusion criteria were: (1) pregnancy; (2) age  $< 50$  years; (3) active malignancy; (4) prior neck irradiation; (5) prior ipsilateral carotid endarterectomy/stenting; (6) ipsilateral carotid occlusion; (7) dementia (8) haemodynamic stroke/TIA due to carotid near-occlusion, and (9) significant renal impairment (estimated glomerular filtration rate  $< 60$ mls/minute) or other contraindication to contrast-enhanced CT or magnetic resonance imaging (MRI). Patients were followed up at 7, 30, 90 days, 1 and 2 years, either by telephone contact or by in-person assessment.

### **BIOVASC: Eligibility**

BIOVASC is a multi-centre prospective cohort study conducted in 10 centres in Ireland (6 sites), Barcelona, Paris, Calgary, and Singapore (1 site each), which recruited 208 patients from 2012-2016. Eligibility criteria were identical to DUCASS, apart from an extension of the time-window from presenting event to enrolment to 30 days. Patients were initially followed up at 7, 30, 90 days and 1 year, either by telephone contact or by in-person assessment. A flow diagram illustrating the screening and recruitment process for both studies are illustrated in Figure 2.

### **Baseline Study Procedures: Co-variates**

The following information was recorded at recruitment: patient demographics, qualifying event, National Institute for Health Stroke Scale (NIHSS) score, mRS, ABCD2 score, medications at time of index event and recruitment, history of smoking, hypertension, hyperlipidaemia, coronary heart disease, atrial fibrillation, peripheral arterial disease, and prior stroke or TIA. Hypertension, hyperlipidaemia, and diabetes mellitus were each defined according to self-reported history, medical record documentation, new diagnosis at recruitment or if the patient was taking anti-hypertensives, lipid-lowering or glucose-lowering medications. Atrial fibrillation was defined according to self-reported history, medical record documentation or if newly diagnosed during hospital admission for the index event. Peripheral arterial disease was defined as medical record or self-reported history of intermittent claudication, abdominal artery aneurysm, or prior peripheral/extra-cranial revascularisation procedure. Coronary heart disease was defined as medical record or self-reported history of MI, angina, or coronary revascularisation.

### **Baseline Study Procedures: Phlebotomy**

In both studies, patients underwent phlebotomy within 72 hours of enrolment. Serum and plasma samples were transferred to a central laboratory and centrifuged at 1600 revolutions per minute for 20 minutes as soon as possible (target <2 hours) and stored at -80 degrees Celsius.

### **Baseline Study Procedures: PET-CT**

1  
2  
3 Standardisation and quality assurance of PET-CT imaging were achieved by 3 methods: (1)  
4 internal PET scanner quality assurance checks using standard phantoms;(22, 23) (2)  
5 adherence to a prespecified standardized protocol; and (3) sensitivity analyses to verify the  
6 consistency of results across participating centers.  $^{18}\text{F}$ -FDG PET-CTA was performed within  
7 7 days (<14 days in DUCASS) of study entry, after a minimum 6-hour fast. PET scans were  
8 not performed if pre-PET blood glucose exceeded 10 mmol/L. We administered 320MBq of  
9  $^{18}\text{F}$ -FDG 2 hours before image acquisition. The uptake phase was standardised with the  
10 patient resting. PET images were acquired in a 3-dimensional mode in 2-bed positions for 10  
11 minutes each. After PET, a low-dose CT for attenuation correction was performed using the  
12 same scanner followed by the aortic arch to skull-base carotid CTA using contrast-bolus  
13 tracking. The PET-CT image acquisition parameters were near-identical in the  
14 BIOVASC and DUCASS studies.

15  
16  
17 Before commencing the analysis, semi-automated co-registration of PET and CT images are  
18 performed, the details of which have been described elsewhere.(23) For symptomatic carotid  
19 arteries  $^{18}\text{F}$ -FDG activity in 10 regions of interest are defined relative to the slice of maximal  
20 stenosis. In the asymptomatic contralateral carotid artery, 30 regions of interest are identified  
21 extending superiorly from the carotid bifurcation.  $^{18}\text{F}$ -FDG activity is quantified using  
22 standardized uptake values (SUV [g/mL] =measured uptake [MBq/mL]/injected dose [MBq]  
23 per patient weight [g]). We define the single 'hottest slice' as the axial slice with maximal  
24 SUV uptake (SUV<sub>max</sub>) and the most diseased segment (MDS) as the single hottest slice plus  
25 the adjacent proximal and distal axial slices, corresponding to vessel area 3mm in length (see  
26 Figure 3, Figure 4(a) and Figure 4(b).(24) All images are centrally analysed by a single  
27 trained reader. Intra-rater reliability assessment showed excellent agreement (intraclass  
28 correlation  $\alpha =0.814$ ,  $P<0.001$ ).(23) For all analyses relating to plaque inflammation-related  
29 metabolism, SUV<sub>max</sub> will be considered as the primary exposure variable of interest. As part  
30 of a sensitivity analysis, a whole-artery approach to calculating SUV<sub>max</sub> will be used to  
31 assess the relationship between target vessel inflammation in asymptomatic carotid  
32 arteries and risk of the composite outcome. Furthermore, the analyses will be repeated  
33 using tissue-to-background-ratio (TBR) as an alternative metric of  $^{18}\text{F}$ -FDG uptake. These  
34 additional analyses will be performed in keeping with recent guidelines issued by the  
35 Cardiovascular Committee of the European Association of Nuclear Medicine on PET  
36 imaging in atherosclerosis.(25)

## BIOVASC-Late: Study Design and Procedures

The BIOVASC-Late study is an extended follow-up study of patients recruited to the DUCASS and BIOVASC cohorts. Participating centres will be limited to the Irish study sites. Patients recruited to the original studies will be invited to participate in a single in-person follow-up assessment (see Figure 5). Consenting patients and/or their caregivers will undergo a standardised interview for any symptoms suspicious for recurrent stroke/TIA, unstable angina, MI, non-fatal cardiac arrest or peripheral arterial disease. Functional outcome will be assessed using the Barthel index and the mRS (using a validated standardised algorithm).(26, 27) Patients who have died since last follow-up will have outcome events recorded by multiple-overlapping methods including contact with the participant's general practitioner, review of hospital records and death certification. Surviving patients will also undergo a comprehensive cognitive evaluation as part of a cognitive sub-study, the protocol of which will be described separately.

Patients will also undergo late phlebotomy, which will be processed in an identical manner to baseline samples taken at recruitment. Patients will be carefully screened for active infection, inflammatory conditions, active malignancy, recent trauma or surgical procedures (<1 month), and in suspected cases phlebotomy will be deferred, where possible, until such time as the condition has resolved. Baseline and late serum samples will be analysed by a trained laboratory scientist, blinded to baseline clinical data, for circulating blood biomarkers of inflammation. CRP will be analysed in serum by immunoturbidimetric detection using the high-sensitive MULTIGENT CRP Vario assay (Abbott Laboratories, Illinois, USA). Interleukin-1 $\beta$  (IL-1 $\beta$ ), IL-6, IL-8, IL10, IL-12p70, Interferon- $\gamma$  (IFN- $\gamma$ ), Tumour Necrosis Factor- $\alpha$  (TNF- $\alpha$ ), will be assessed by electro-chemi-luminescent detection, using a commercially available 96 well-plate Human Pro-Inflammatory multi-Plex Ultra Sensitive Kit (Merck Sharp & Dohme, Maryland, USA). MCP-1 will be analysed using an enzyme-linked immunosorbent assay (Thermo Fisher Scientific, Massachusetts, USA).

## Outcome Definitions

Suspected outcome events will be confirmed by in-person evaluation by a Study Investigator and by medical record review. Any suspected stroke or cardiovascular outcome events will then be independently confirmed by another Study Investigator (PK), blinded to baseline data.

1  
2  
3 Recurrent stroke will be defined as a sudden-onset worsened neurological deficit lasting  
4 greater than 24 hours occurring after <sup>18</sup>F-FDG PET-CTA. Gradual progression of an existing  
5 neurological deficit, sub-clinical detection of new infarction on neuroimaging, or  
6 deterioration due to cerebral oedema, large haemorrhagic transformation, seizure, metabolic  
7 disturbance or other illness will be excluded. Only recurrent strokes unrelated to a  
8 revascularisation procedure (defined as before or later than 24 hours of carotid  
9 revascularisation) will be defined as outcomes. MI will be defined according to the third  
10 universal definition.(28) Unstable angina requiring hospitalisation will be defined according  
11 to consensus criteria outlined by the Standardized Data Collection for Cardiovascular Trials  
12 Initiative and the US Food and Drug Administration (FDA).(29) Non-fatal cardiac arrest will  
13 be defined as recovery from sudden collapse, with electrocardiogram (ECG) rhythm-strip  
14 verified cardiac asystole, ventricular tachycardia, or ventricular fibrillation. Vascular death  
15 will be defined as sudden cardiac death, fatal myocardial infarction, fatal ischaemic stroke, or  
16 death due to mesenteric ischaemia or peripheral arterial disease. Peripheral arterial endpoints  
17 will include acute limb ischaemia, peripheral arterial revascularisation, mesenteric ischaemia,  
18 or peripheral amputation for vascular causes. Acute limb ischaemia will refer to  
19 hospitalisation for a rapid or sudden decrease in limb perfusion and either: 1) a new pulse  
20 deficit, rest pain, pallor, paraesthesia or paralysis; or 2) confirmation of arterial obstruction  
21 by limb haemodynamics (ankle or toe pressure), imaging, intraoperative findings, or  
22 pathological evaluation. Peripheral revascularisation will be defined as any peripheral  
23 procedure performed to treat limb ischaemia or prevent major limb ischemic events and will  
24 include endovascular or surgical revascularisation as well as amputation, but will not include  
25 carotid artery revascularisation. Mesenteric ischaemia will be defined as imaging or autopsy  
26 evidence of small or large bowel ischaemic infarction.  
27  
28  
29  
30  
31  
32  
33  
34  
35  
36  
37  
38  
39  
40  
41  
42  
43  
44  
45

### 46 **Baseline clinical characteristics of study participants**

47  
48  
49 The baseline clinical characteristics of DUCASS and BIOVASC, as well as the pooled  
50 dataset of BIOVASC-Late, are outlined in Table 1. Baseline characteristics of both cohorts  
51 were similar, apart from a higher rate of atrial fibrillation and a slightly greater degree of  
52 stroke-severity in DUCASS. A greater proportion of patients in BIOVASC were taking anti-  
53 platelet medications and a lower proportion taking anti-coagulants at the time of recruitment,  
54 compared with patients in DUCASS.  
55  
56  
57  
58  
59  
60

Table 1: Baseline characteristics of BIOVASC and DUCASS study cohorts

|                                                    | BIOVASC-Late<br>Pooled Data<br>(n=285) | DUCASS<br>(n=77) | BIOVASC<br>(n=208) | P value |
|----------------------------------------------------|----------------------------------------|------------------|--------------------|---------|
| <b>Demographics (n=285)</b>                        |                                        |                  |                    |         |
| Age                                                | 69.8 (9.8)                             | 70.6 (10.3)      | 69.5 (9.6)         | 0.4     |
| Sex, male                                          | 68.4 (195)                             | 68.8% (53)       | 68.3 (142)         | 0.93    |
| Ethnicity, Caucasian                               | 100 (285)                              | 100 (77)         | 100 (208)          | 1       |
| <b>Index event (n=285)</b>                         |                                        |                  |                    |         |
| TIA                                                | 39.6 (113)                             | 40.3 (31)        | 39.4 (82)          | 0.83    |
| Ischaemic stroke                                   | 43.9 (125)                             | 45.4 (35)        | 43.3 (90)          |         |
| Retinal embolism                                   | 16.5 (47)                              | 14.3 (11)        | 17.3 (36)          |         |
| <b>Smoking status (n=284)</b>                      |                                        |                  |                    |         |
| Current                                            | 40.8 (116)                             | 39 (30)          | 41.6 (86)          | 0.88    |
| Previous                                           | 40.5 (115)                             | 42.9 (33)        | 39.6 (82)          |         |
| Never                                              | 18.7 (53)                              | 18.2 (14)        | 18.8 (39)          |         |
| <b>Other risk factors</b>                          |                                        |                  |                    |         |
| Hypertension (n=284)                               | 88 (250)                               | 90.9 (70)        | 87 (180)           | 0.36    |
| Diabetes Mellitus (n=284)                          | 16.9 (48)                              | 19.5 (15)        | 15.9 (33)          | 0.48    |
| Hyperlipidaemia (n=285)                            | 78.6 (224)                             | 77.9 (60)        | 78.8 (164)         | 0.87    |
| Atrial fibrillation (n=284)                        | 14.4 (41)                              | 23.4 (18)        | 11.1 (23)          | 0.01    |
| Coronary heart disease<br>(n=284)                  | 32 (91)                                | 35.1 (27)        | 30.9 (64)          | 0.51    |
| Peripheral arterial disease<br>(n=284)             | 9.5 (27)                               | 13 (10)          | 8.2 (17)           | 0.22    |
| <b>Medications &amp; therapeutic interventions</b> |                                        |                  |                    |         |
| Statin at index event<br>(n=284)                   | 50 (142)                               | 45.5 (35)        | 51.7 (107)         | 0.35    |
| Statin at recruitment<br>(n=284)                   | 92.6 (263)                             | 94.8 (73)        | 91.8 (190)         | 0.39    |
| High-intensity statin at<br>recruitment (n=279)    | 63.8 (178)                             | 63.9 (46)        | 63.8 (132)         | 0.99    |
| Antiplatelet at index event                        | 46.8 (133)                             | 50.6 (39)        | 45.4 (94)          | 0.43    |



|                                           |            |           |            |        |
|-------------------------------------------|------------|-----------|------------|--------|
| (n=284)                                   |            |           |            |        |
| Anti-platelet at recruitment (n=283)      | 92.6 (262) | 85.5 (65) | 95.2 (197) | 0.01   |
| Anticoagulant at index event (n=284)      | 5.6 (16)   | 6.5 (5)   | 5.3 (11)   | 0.7    |
| Oral anticoagulant at recruitment (n=284) | 8.8 (25)   | 16.9 (13) | 5.8 (12)   | 0.003  |
| IV tpa (n=284)                            | 6.7 (19)   | 3.9 (3)   | 7.7 (16)   | 0.25   |
| EVT (n=284)                               | 0 (0)      | 0 (0)     | 0 (0)      | 1      |
| Carotid endarterectomy (n=284)            | 64.1 (182) | 53.3 (41) | 68.1 (141) | 0.02   |
| Carotid stenting (n=284)                  | 2.5 (7)    | 1.3 (1)   | 2.9 (6)    | 0.44   |
| <hr/>                                     |            |           |            |        |
| Stroke severity, median (IQR)             |            |           |            |        |
| NIHSS (n=281)                             | 0 (0-2)    | 1 (0-2)   | 0 (0-1)    | <0.001 |
| Modified Rankin Scale (n=282)             | 0 (0-1)    | 1 (0-2)   | 0 (0-1)    | 0.002  |
| <hr/>                                     |            |           |            |        |
| Stenosis severity (n=285)                 |            |           |            |        |
| Moderate                                  | 46.7 (133) | 61 (47)   | 41.4 (86)  | 0.8*   |
| Severe                                    | 43.5 (124) | 28.6 (22) | 49 (102)   |        |
| Near-occlusion                            | 9.8 (28)   | 10.4 (8)  | 9.6 (20)   |        |

Categorical data expressed as % (number). Continuous data expressed as mean (Standard Deviation) unless otherwise stated.  $\chi^2$  test is used for comparing differences in proportions. 2 sample t-test is used or the Mann-Whitney U test was used for continuous data as appropriate. The chi-squared statistical test for trend was used for comparing proportions in ordered categorical data (>2 groups). Table legend: IV tpa, intravenous tissue plasminogen activator; evt, endovascular therapy; IQR, interquartile range. \* p value for chi-squared statistical test for trend.

### Patient and public involvement

Patients were not involved in the design of either study. However, since the study was initiated the Stroke Clinical Trials Network Ireland (SCTNI) has developed a formal strategy for patient-public involvement (PPI) and has formally recruited designated patient

1  
2  
3 ambassadors, who will be consulted prior to dissemination of the study's results to  
4 participating patients.  
5  
6

### 7 8 Statistical Analysis Plan 9

10 Clinical characteristics will be compared using t tests, Mann-Whitney, or  $\chi^2$  tests. Non-  
11 parametric tests will be used where data is not normally distributed. The plaque SUV<sub>max</sub> will  
12 be the exposure variable for hypothesis testing. Bivariate and multivariable Cox regression  
13 will be performed to determine factors associated with dichotomous outcomes, associated  
14 with 1 g/mL increase in SUV<sub>max</sub> in culprit/non-culprit plaque, with censoring at the time of a  
15 recurrent vascular event, last follow-up visit or death. Cox proportional hazard regression  
16 will be used to estimate the unadjusted hazard ratio for SUV<sub>max</sub> with time-to-event as the  
17 dependent variable. The proportional hazard assumption will be tested by visual examination  
18 of survival curves and by the Schoenfeld test. Forward stepwise multivariable Cox regression  
19 will be used to estimate the adjusted hazard ratio for the biomarker level after adjusting for  
20 potential confounding variables. Independent variables will be included in the model based  
21 on a p-value of  $\leq 0.05$  on bivariate analysis or a known clinical rationale for association with  
22 stroke recurrence. Associations between continuous variables will be analysed using  
23 Pearson's correlation coefficient for biomarkers with a normal distribution and Spearman's  
24 correlation test for biomarkers with a non-normal distribution. Simple linear regression  
25 analysis will be used to explore the associations between SUV<sub>max</sub> (outcome variable) and  
26 inflammatory cytokines (explanatory variables). All significance testing will be 2-sided, with  
27 a p value of  $< 0.05$  considered significant. All analyses will be performed using Stata Version  
28 15.0.  
29  
30  
31  
32  
33  
34  
35  
36  
37  
38  
39  
40  
41  
42  
43  
44

45 As this is a follow-up study the sample size for the primary hypothesis is fixed. Assuming a  
46 10% loss to follow-up and a rate of recurrent vascular events in the region of 6% per year,<sup>(2)</sup>  
47 the study will have 83% power to detect a hazard ratio of 2, per unit rise in SUV<sub>max</sub>, for the  
48 composite primary outcome of any major vascular event. This calculation is based on the  
49 observed baseline standard deviation of SUV<sub>max</sub> in the sample.  
50  
51  
52  
53  
54

### 55 **FINDINGS TO DATE** 56

57  
58 Patients recruited to BIOVASC and DUCASS underwent carotid <sup>18</sup>F-FDG PET-CTA shortly  
59 after enrolment. Both studies showed that increased plaque <sup>18</sup>F-FDG uptake was  
60

1  
2  
3 independently associated with early recurrent stroke at 90 days.(30, 31) The incorporation of  
4  $^{18}\text{F}$ -FDG plaque uptake into a clinical prediction model also improves discrimination of early  
5 recurrent stroke, when compared with risk stratification by luminal stenosis alone.(32)  
6  
7 Improved methods to identify patients at the highest risk of stroke may refine selection for  
8 carotid revascularisation, allowing surgery to be targeted towards patients most likely to  
9 benefit. These findings show that plaque inflammation is a clinically important and  
10 independent predictor of early stroke recurrence in symptomatic carotid disease.  
11  
12  
13  
14

## 15 16 **STRENGTHS AND LIMITATIONS**

17  
18 An increasing body of evidence supports the hypothesis that inflammation plays an important  
19 role in stroke.(33) However, prospectively designed multi-centred studies relating blood and  
20 imaging biomarkers of inflammation to late outcome vascular events in stroke patients are  
21 lacking. Whilst results from RCTs of anti-inflammatory agents in coronary patients have  
22 shown recent promise, better data is needed to inform the need for future trials of anti-  
23 inflammatory agents in a stroke population.  
24  
25  
26  
27  
28

29  
30 To our knowledge, BIOVASC-Late is the first multi-centred observational study to  
31 investigate the prognostic utility of  $^{18}\text{F}$ -FDG PET-CTA for late outcome vascular events in  
32 stroke patients. It will also contribute important observations regarding the cross-sectional  
33 relationship between plaque FDG-uptake and (i) circulating inflammatory cytokines  
34 measured shortly after an acute stroke/TIA and (ii) FDG-uptake in the contralateral  
35 asymptomatic carotid artery. Other strengths of the study include an in-person evaluation of  
36 suspected outcome events, blinded outcome assessments, rigorous quality assurance  
37 protocols to ensure standardisation of image acquisition, and a centralised/blinded image  
38 analysis. Finally, the anticipated median duration of follow-up in BIOVASC-Late will be 7  
39 years, which surpasses most contemporary observational studies of stroke patients.  
40  
41  
42  
43  
44  
45  
46  
47

48 Our study has some limitations. Firstly, as this is a late follow-up study, the sample size is  
49 fixed, which means that the analyses for some secondary outcomes may be underpowered.  
50 Secondly, there are limitations to PET-CTA as a plaque-imaging modality, including its  
51 limited spatial resolution and inability to identify potentially relevant plaque features (eg.  
52 intraplaque hemorrhage or surface ulceration), which have been associated with stroke  
53 recurrence. Thirdly, as some patients will have died since recruitment, in-person evaluation  
54 will not be possible in these patients and adjudication of events will be limited to source  
55  
56  
57  
58  
59  
60

1  
2  
3 documentation. This may lead to an under-detection or misclassification of outcomes.  
4 However, we expect that the utilization of multiple overlapping sources to identify late  
5 outcomes will minimise the risk of this happening.  
6  
7

8  
9 Whilst these limitations need to be borne in mind, BIOVASC-Late will help answer  
10 important questions regarding the long-term association between vascular inflammation  
11 (measured using  $^{18}\text{F}$ -FDG PET and circulating inflammatory cytokines) and recurrent major  
12 vascular events in stroke patients.  
13  
14  
15

## 16 17 **COLLABORATION**

18  
19 Access to the primary data will be made available on request to the corresponding author  
20 after final publication of the study findings. We also encourage collaboration with other  
21 investigators and will consider any reasonable request for data sharing initiatives to improve  
22 research in the field.  
23  
24  
25  
26

## 27 28 **FURTHER DETAILS**

### 29 30 **Ethics approval and consent to participate**

31  
32 This study has received ethical approval by the Institutional Review Boards of the  
33 participating hospital sites. Recruited patients provided written informed consent at  
34 enrolment. We plan to publish the findings of BIOVASC-Late in peer-reviewed journals and  
35 at international conferences appropriate to the field of research.  
36  
37  
38  
39  
40

### 41 42 **Funding**

43  
44 This study is supported by a Clinician Scientist Award grant received from the Health  
45 Research Board Ireland. The funding body did not contribute to the design of the study,  
46 collection, analysis or interpretation of data, or in the writing of this manuscript.  
47  
48  
49  
50

### 51 52 **Consent for publication**

53  
54 All authors have seen and approved the final version of the manuscript.  
55

### 56 57 **Acknowledgments**

58  
59 All Stroke Clinical Trials Network Ireland (SCTNI) collaborators.  
60

## Competing Interests

Dr. Kelly receives funding from Health Research Board Ireland Clinician Scientist and Clinical Trials Network Awards, and the Irish Heart Foundation. Dr. Williams receives funding from the Health Research Board of Ireland.

## List of abbreviations

<sup>18</sup>F-fluorodeoxyglucose, <sup>18</sup>F-FDG; Positron emission tomography, PET; Biomarkers Imaging Vulnerable Atherosclerosis in Symptomatic Carotid disease, BIOVASC; Dublin Carotid Atherosclerosis Study, DUCASS; Transient ischaemic attack, TIA; Computerised Tomography Angiography, CTA; C-reactive Protein, CRP; standardized uptake value, SUV<sub>max</sub>; tissue-to-background ratio, TBR; Monocyte-chemoattractant protein-1, MCP-1; myocardial infarction, MI; modified Rankin Scale, mRS; magnetic resonance angiogram, MRA; magnetic resonance imaging, MRI; National Institute for Health Stroke Scale, NIHSS; Standard Occupational Classification, SOS; Hospital Anxiety Depression Scale, HADS; Interleukin-1 $\beta$ , IL-1 $\beta$ ; Interleukin-6, IL-6; Interleukin-8, IL-8, Interleukin-10, IL10; Interleukin-12p70, IL-12p70; Interferon- $\gamma$ , IFN- $\gamma$ ; Tumour Necrosis Factor- $\alpha$ , TNF- $\alpha$ ; millimoles per litre, mmol/L; Megabecquerel, MBq; Standardised uptake value, SUV; grammes, g; millilitre, ml; Food and Drug Administration, FDA; Electrocardiogram, ECG; Stroke Clinical Trials Network Ireland, SCTNI; Patient-public involvement, PPI.

## Authors' contributions

JJM contributed to study design, data acquisition and manuscript preparation. NG contributed to the study design, data acquisition, data analysis and manuscript preparation. JPM planned the study design, contributed to the acquisition of data, led the imaging data analysis, and contributed to data management and manuscript preparation. SM contributed to study design, data acquisition, study conduct and manuscript preparation. MB contributed to the study design, data acquisition, and manuscript preparation. TC contributed to the study design, data acquisition, and manuscript preparation. SCron contributed to the study design, study conduct, data acquisition and manuscript preparation. ED contributed to the study design, conduct of the study, data acquisition, and manuscript preparation. SF planned the study design, contributed to the acquisition of data, contributed to imaging data analysis, and manuscript preparation. JH contributed to the study design, conduct of the study, data

1  
2  
3 acquisition, and manuscript preparation. SCov contributed to the study design, data  
4 acquisition, and manuscript preparation. SCol contributed to data acquisition and manuscript  
5 preparation. GH contributed to the study design, conduct of the study, data acquisition, data  
6 management, outcome assessment, and manuscript preparation. EK contributed to the study  
7 design, data acquisition, and manuscript preparation. CM contributed to the study design,  
8 conduct of the study, data acquisition, and manuscript preparation. DJW contributed to the  
9 study design, conduct of the study, data acquisition, and manuscript preparation. MOC  
10 contributed to the study design, oversight of study PET procedures, data acquisition, data  
11 analysis, and manuscript preparation. MM planned the study design and contributed to data  
12 acquisition, data analysis and manuscript preparation. PJK is the principal investigator of the  
13 BIOVASC and DUCASS Studies, planned the study design and contributed to data  
14 acquisition, data analysis, outcome adjudication and manuscript preparation. All authors read  
15 and approved the final manuscript.  
16  
17  
18  
19  
20  
21  
22  
23  
24  
25  
26  
27  
28  
29  
30  
31  
32  
33  
34  
35  
36  
37  
38  
39  
40  
41  
42  
43  
44  
45  
46  
47  
48  
49  
50  
51  
52  
53  
54  
55  
56  
57  
58  
59  
60

## References

1. Collaborators GBDS. Global, regional, and national burden of stroke, 1990-2016: a systematic analysis for the Global Burden of Disease Study 2016. *Lancet Neurol.* 2019.
2. Boulanger M, Bejot Y, Rothwell PM, Touze E. Long-Term Risk of Myocardial Infarction Compared to Recurrent Stroke After Transient Ischemic Attack and Ischemic Stroke: Systematic Review and Meta-Analysis. *J Am Heart Assoc.* 2018;7(2).
3. Marnane M, Prendeville S, McDonnell C, Noone I, Barry M, Crowe M, et al. Plaque inflammation and unstable morphology are associated with early stroke recurrence in symptomatic carotid stenosis. *Stroke.* 2014;45(3):801-6.
4. Redgrave JNE, Lovett JK, Gallagher PJ, Rothwell PM. Histological assessment of 526 symptomatic carotid plaques in relation to the nature and timing of ischemic symptoms - The Oxford plaque study. *Circulation.* 2006;113(19):2320-8.
5. Libby P. Inflammation in atherosclerosis. *Nature.* 2002;420(6917):868-74.
6. Tardif JC, Kouz S, Waters DD, Bertrand OF, Diaz R, Maggioni AP, et al. Efficacy and Safety of Low-Dose Colchicine after Myocardial Infarction. *N Engl J Med.* 2019.
7. Nidorf SM, Eikelboom JW, Budgeon CA, Thompson PL. Low-dose colchicine for secondary prevention of cardiovascular disease. *J Am Coll Cardiol.* 2013;61(4):404-10.
8. Ridker PM, Everett BM, Thuren T, MacFadyen JG, Chang WH, Ballantyne C, et al. Antiinflammatory Therapy with Canakinumab for Atherosclerotic Disease. *New Engl J Med.* 2017;377(12):1119-31.
9. Cocker MS, Spence JD, Hammond R, deKemp RA, Lum C, Wells G, et al. [18F]-Fluorodeoxyglucose PET/CT imaging as a marker of carotid plaque inflammation: Comparison to immunohistology and relationship to acuity of events. *Int J Cardiol.* 2018;271:378-86.
10. Rudd JH, Warburton EA, Fryer TD, Jones HA, Clark JC, Antoun N, et al. Imaging atherosclerotic plaque inflammation with [18F]-fluorodeoxyglucose positron emission tomography. *Circulation.* 2002;105(23):2708-11.
11. Rudd JH, Myers KS, Bansilal S, Machac J, Woodward M, Fuster V, et al. Relationships among regional arterial inflammation, calcification, risk factors, and biomarkers: a prospective fluorodeoxyglucose positron-emission tomography/computed tomography imaging study. *Circ Cardiovasc Imaging.* 2009;2(2):107-15.
12. Figueroa AL, Abdelbaky A, Truong QA, Corsini E, MacNabb MH, Lavender ZR, et al. Measurement of arterial activity on routine FDG PET/CT images improves prediction of risk of future CV events. *JACC Cardiovasc Imaging.* 2013;6(12):1250-9.
13. Emerging Risk Factors C, Kaptoge S, Di Angelantonio E, Lowe G, Pepys MB, Thompson SG, et al. C-reactive protein concentration and risk of coronary heart disease, stroke, and mortality: an individual participant meta-analysis. *Lancet.* 2010;375(9709):132-40.
14. Fibrinogen Studies C, Danesh J, Lewington S, Thompson SG, Lowe GD, Collins R, et al. Plasma fibrinogen level and the risk of major cardiovascular diseases and nonvascular mortality: an individual participant meta-analysis. *JAMA.* 2005;294(14):1799-809.
15. Georgakis MK, Malik R, Bjorkbacka H, Pana TA, Demissie S, Ayers C, et al. Circulating Monocyte Chemoattractant Protein-1 and Risk of Stroke: Meta-Analysis of Population-Based Studies Involving 17 180 Individuals. *Circ Res.* 2019;125(8):773-82.
16. Elkind MS, Luna JM, McClure LA, Zhang Y, Coffey CS, Roldan A, et al. C-reactive protein as a prognostic marker after lacunar stroke: levels of inflammatory markers in the treatment of stroke study. *Stroke.* 2014;45(3):707-16.

17. Li J, Zhao X, Meng X, Lin J, Liu L, Wang C, et al. High-Sensitive C-Reactive Protein Predicts Recurrent Stroke and Poor Functional Outcome: Subanalysis of the Clopidogrel in High-Risk Patients With Acute Nondisabling Cerebrovascular Events Trial. *Stroke*. 2016;47(8):2025-30.
18. Rothwell PM, Howard SC, Power DA, Gutnikov SA, Algra A, van Gijn J, et al. Fibrinogen concentration and risk of ischemic stroke and acute coronary events in 5113 patients with transient ischemic attack and minor ischemic stroke. *Stroke*. 2004;35(10):2300-5.
19. Castillo J, Alvarez-Sabin J, Martinez-Vila E, Montaner J, Sobrino T, Vivancos J, et al. Inflammation markers and prediction of post-stroke vascular disease recurrence: the MITICO study. *Journal of Neurology*. 2009;256(2):217-24.
20. Boehme AK, McClure LA, Zhang Y, Luna JM, Del Brutto OH, Benavente OR, et al. Inflammatory Markers and Outcomes After Lacunar Stroke: Levels of Inflammatory Markers in Treatment of Stroke Study. *Stroke*. 2016;47(3):659-67.
21. Welsh P, Lowe GD, Chalmers J, Campbell DJ, Rumley A, Neal BC, et al. Associations of proinflammatory cytokines with the risk of recurrent stroke. *Stroke*. 2008;39(8):2226-30.
22. Boellaard R, O'Doherty MJ, Weber WA, Mottaghy FM, Lonsdale MN, Stroobants SG, et al. FDG PET and PET/CT: EANM procedure guidelines for tumour PET imaging: version 1.0. *Eur J Nucl Med Mol Imaging*. 2010;37(1):181-200.
23. Giannotti N, O'Connell MJ, Foley SJ, Kelly PJ, McNulty JP. Carotid atherosclerotic plaques standardised uptake values: software challenges and reproducibility. *EJNMMI Res*. 2017;7(1):39.
24. Tawakol A, Fayad ZA, Mogg R, Alon A, Klimas MT, Dansky H, et al. Intensification of statin therapy results in a rapid reduction in atherosclerotic inflammation: results of a multicenter fluorodeoxyglucose-positron emission tomography/computed tomography feasibility study. *J Am Coll Cardiol*. 2013;62(10):909-17.
25. Bucerius J, Hyafil F, Verberne HJ, Slart RH, Lindner O, Sciagra R, et al. Position paper of the Cardiovascular Committee of the European Association of Nuclear Medicine (EANM) on PET imaging of atherosclerosis. *Eur J Nucl Med Mol Imaging*. 2016;43(4):780-92.
26. Bruno A, Shah N, Lin C, Close B, Hess DC, Davis K, et al. Improving modified Rankin Scale assessment with a simplified questionnaire. *Stroke*. 2010;41(5):1048-50.
27. Collin C, Wade DT, Davies S, Horne V. The Barthel ADL Index: a reliability study. *Int Disabil Stud*. 1988;10(2):61-3.
28. Thygesen K, Alpert JS, Jaffe AS, Simoons ML, Chaitman BR, White HD, et al. Third universal definition of myocardial infarction. *Circulation*. 2012;126(16):2020-35.
29. Hicks KA, Mahaffey KW, Mehran R, Nissen SE, Wiviott SD, Dunn B, et al. 2017 Cardiovascular and Stroke Endpoint Definitions for Clinical Trials. *Circulation*. 2018;137(9):961-72.
30. Marnane M, Merwick A, Sheehan OC, Hannon N, Foran P, Grant T, et al. Carotid plaque inflammation on 18F-fluorodeoxyglucose positron emission tomography predicts early stroke recurrence. *Ann Neurol*. 2012;71(5):709-18.
31. Kelly PJ, Camps-Renom P, Giannotti N, Marti-Fabregas J, Murphy S, McNulty J, et al. Carotid Plaque Inflammation Imaged by (18)F-Fluorodeoxyglucose Positron Emission Tomography and Risk of Early Recurrent Stroke. *Stroke*. 2019;50(7):1766-73.
32. Kelly PJ, Camps-Renom P, Giannotti N, Marti-Fabregas J, McNulty JP, Baron JC, et al. A Risk Score Including Carotid Plaque Inflammation and Stenosis Severity Improves Identification of Recurrent Stroke. *Stroke*. 2020;51(3):838-45.



1  
2  
3 33. Kelly PJ, Murphy S, Coveney S, Purroy F, Lemmens R, Tsivgoulis G, et al. Anti-  
4 inflammatory approaches to ischaemic stroke prevention. *J Neurol Neurosurg Psychiatry*.  
5 2018;89(2):211-8.  
6  
7  
8  
9  
10  
11  
12  
13  
14  
15  
16  
17  
18  
19  
20  
21  
22  
23  
24  
25  
26  
27  
28  
29  
30  
31  
32  
33  
34  
35  
36  
37  
38  
39  
40  
41  
42  
43  
44  
45  
46  
47  
48  
49  
50  
51  
52  
53  
54  
55  
56  
57  
58  
59  
60

For peer review only

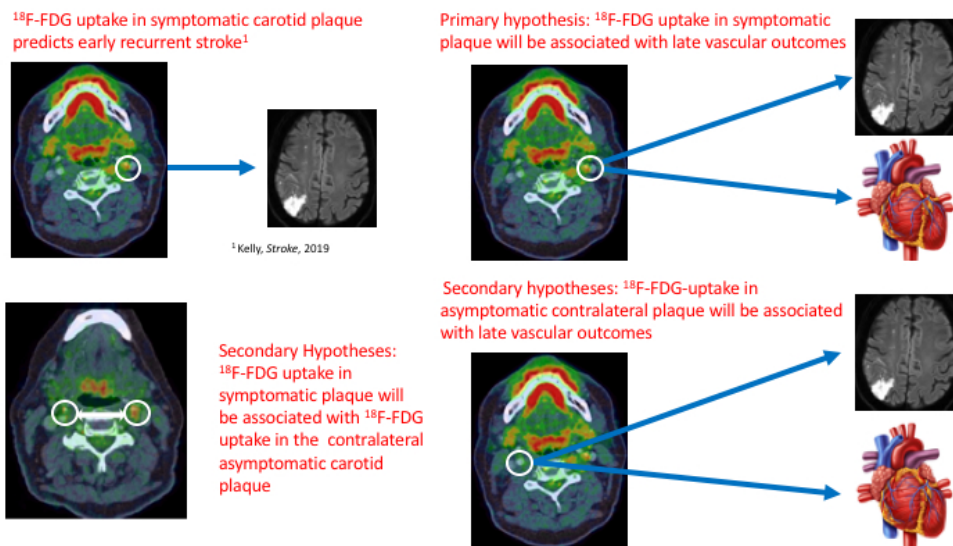

Figure 1: Schematic representation of primary and secondary hypotheses of BIOVASC-Late.

338x190mm (54 x 54 DPI)

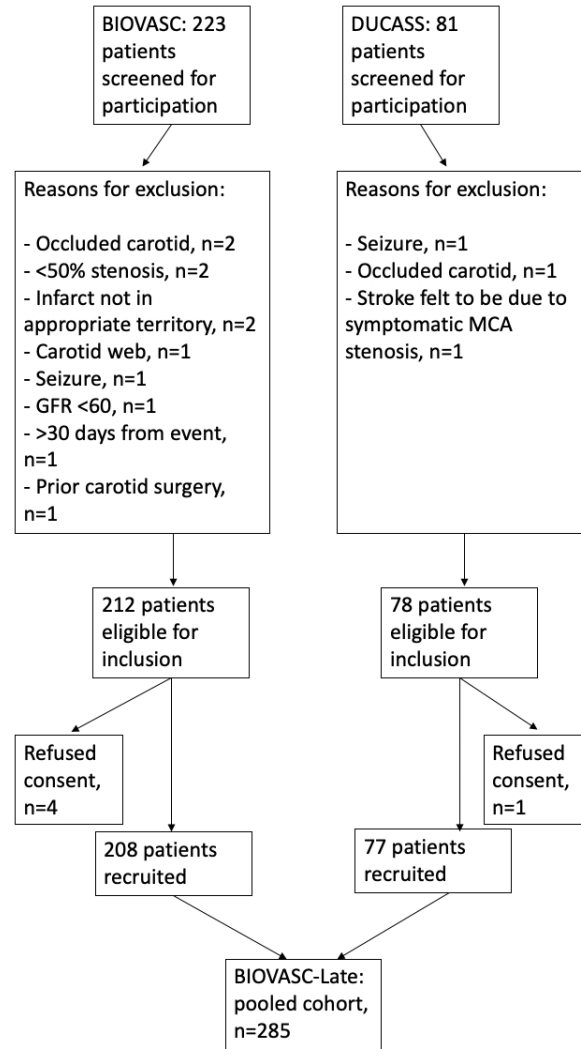

Figure 2: Flow diagram illustrating screening and recruitment process for BIOVASC and DUCASS cohorts. GFR, glomerular filtration rate; MCA, middle cerebral artery.

190x338mm (96 x 96 DPI)

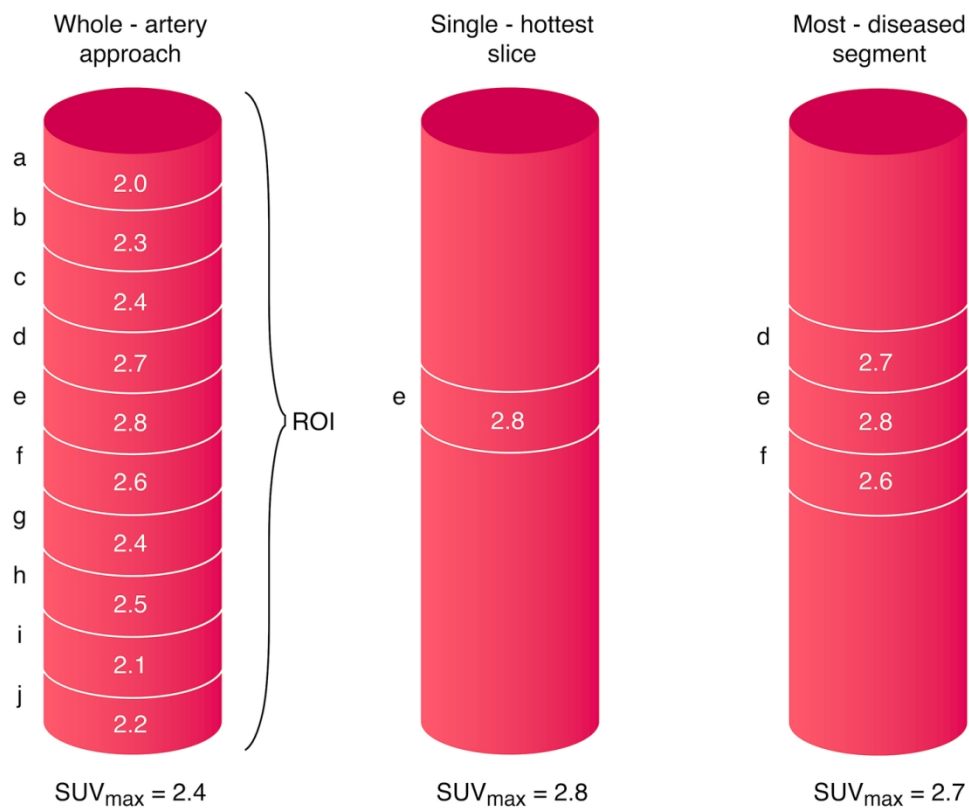

Figure 3: Schematic representation of 18-F-FDG PET-CTA image acquisition. 10 regions of interest (ROI) are defined as 1mm-thick slices above and below the area of maximal luminal narrowing in the symptomatic carotid artery. 30 ROI are defined superior to the carotid bifurcation in the contralateral asymptomatic carotid artery (not shown). 18-F-FDG uptake in the vessel wall is quantified using standardized uptake values (SUV [g/mL]) with the highest uptake in each slice defined as the SUV<sub>max</sub>. The whole-artery approach to measuring vessel inflammation calculates the average of the SUV<sub>max</sub> across the ROI  $(a+b+c+d+e+f+g+h+i+j/10)$ . The single hottest slice is defined as the axial slice with highest SUV<sub>max</sub> (slice 'e'). 18F-FDG-uptake in the most-diseased-segment (MDS) is taken as the average of the SUV<sub>max</sub> across 3 slices defined relative to the SHS  $(d+e+f/3)$ .

63x53mm (600 x 600 DPI)

1  
2  
3  
4  
5  
6  
7  
8  
9  
10  
11  
12  
13  
14  
15  
16  
17  
18  
19  
20  
21  
22  
23  
24  
25  
26  
27  
28  
29  
30  
31  
32  
33  
34  
35  
36  
37  
38  
39  
40  
41  
42  
43  
44  
45  
46  
47  
48  
49  
50  
51  
52  
53  
54  
55  
56  
57  
58  
59  
60

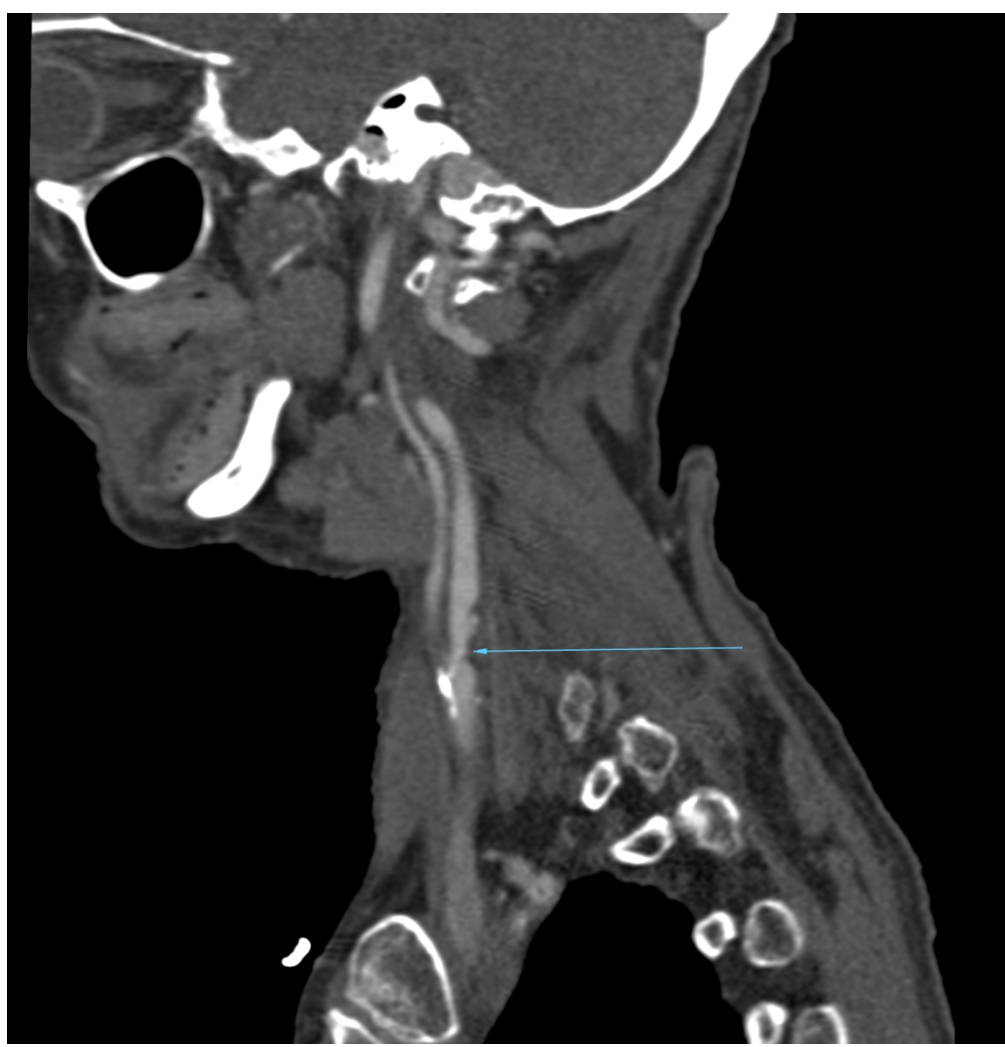

Figure 4(a): CTA shows a moderate (~50%) stenosis of the left proximal internal carotid artery (blue arrow) in a recently symptomatic stroke patient presenting with right sided weakness and dysphasia.

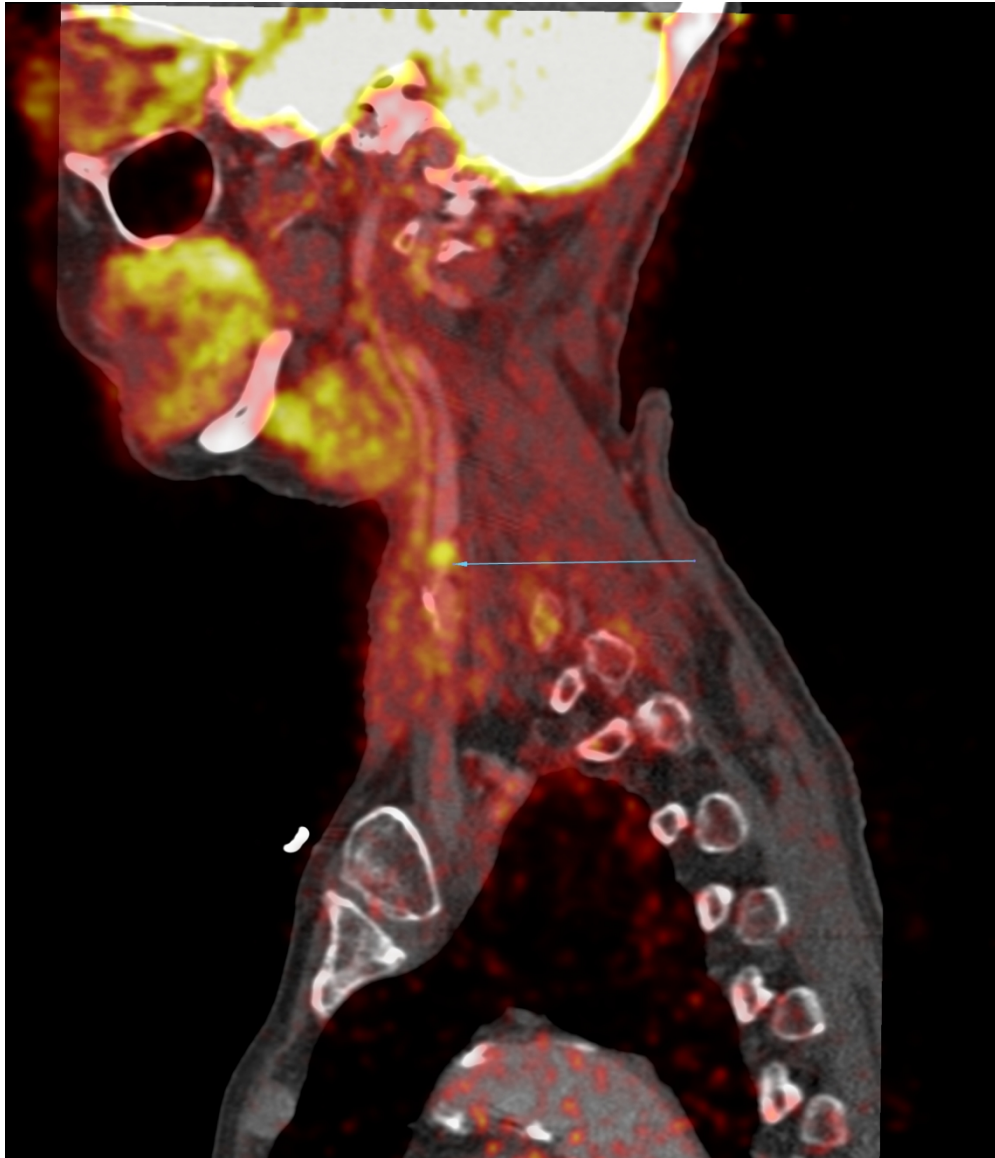

Figure 4(b): Co-registered  $^{18}\text{F}$ -FDG PET-CTA of same patient shows increased focal FDG-uptake in the region of the carotid plaque.

1  
2  
3  
4  
5  
6  
7  
8  
9  
10  
11  
12  
13  
14  
15  
16  
17  
18  
19  
20  
21  
22  
23  
24  
25  
26  
27  
28  
29  
30  
31  
32  
33  
34  
35  
36  
37  
38  
39  
40  
41  
42  
43  
44  
45  
46  
47  
48  
49  
50  
51  
52  
53  
54  
55  
56  
57  
58  
59  
60

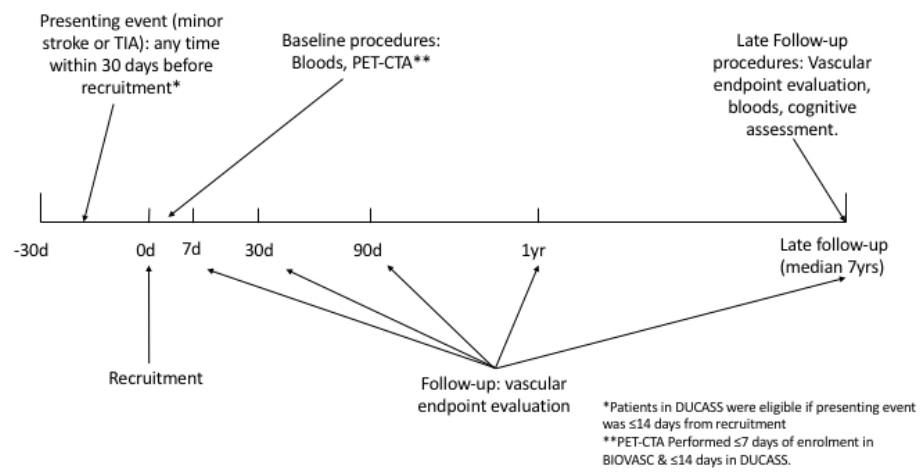

Figure 5: Schematic representation of timeline of BIOVASC-Late study.

338x190mm (54 x 54 DPI)

# BMJ Open

## Cohort profile: BIOVASC-Late, A Prospective Multi-Centred Study of Imaging and Blood Biomarkers of Carotid Plaque Inflammation and Risk of Late Vascular Recurrence after Non-severe Stroke in Ireland.

|                               |                                                                                                                                                                                                                                                                                                                                                                                                                                                                                                                                                                                                                                                                                                                                                                                                                                                                                                                                                                                                                                                                                                                                                                                                                                                                                                                                                                                                                                                                                                                                                                                                                                                                                                                                                                                                                                                                                                                                                                                                                                                                                                                                                                                                                                |
|-------------------------------|--------------------------------------------------------------------------------------------------------------------------------------------------------------------------------------------------------------------------------------------------------------------------------------------------------------------------------------------------------------------------------------------------------------------------------------------------------------------------------------------------------------------------------------------------------------------------------------------------------------------------------------------------------------------------------------------------------------------------------------------------------------------------------------------------------------------------------------------------------------------------------------------------------------------------------------------------------------------------------------------------------------------------------------------------------------------------------------------------------------------------------------------------------------------------------------------------------------------------------------------------------------------------------------------------------------------------------------------------------------------------------------------------------------------------------------------------------------------------------------------------------------------------------------------------------------------------------------------------------------------------------------------------------------------------------------------------------------------------------------------------------------------------------------------------------------------------------------------------------------------------------------------------------------------------------------------------------------------------------------------------------------------------------------------------------------------------------------------------------------------------------------------------------------------------------------------------------------------------------|
| Journal:                      | <i>BMJ Open</i>                                                                                                                                                                                                                                                                                                                                                                                                                                                                                                                                                                                                                                                                                                                                                                                                                                                                                                                                                                                                                                                                                                                                                                                                                                                                                                                                                                                                                                                                                                                                                                                                                                                                                                                                                                                                                                                                                                                                                                                                                                                                                                                                                                                                                |
| Manuscript ID                 | bmjopen-2020-038607.R1                                                                                                                                                                                                                                                                                                                                                                                                                                                                                                                                                                                                                                                                                                                                                                                                                                                                                                                                                                                                                                                                                                                                                                                                                                                                                                                                                                                                                                                                                                                                                                                                                                                                                                                                                                                                                                                                                                                                                                                                                                                                                                                                                                                                         |
| Article Type:                 | Cohort profile                                                                                                                                                                                                                                                                                                                                                                                                                                                                                                                                                                                                                                                                                                                                                                                                                                                                                                                                                                                                                                                                                                                                                                                                                                                                                                                                                                                                                                                                                                                                                                                                                                                                                                                                                                                                                                                                                                                                                                                                                                                                                                                                                                                                                 |
| Date Submitted by the Author: | 27-May-2020                                                                                                                                                                                                                                                                                                                                                                                                                                                                                                                                                                                                                                                                                                                                                                                                                                                                                                                                                                                                                                                                                                                                                                                                                                                                                                                                                                                                                                                                                                                                                                                                                                                                                                                                                                                                                                                                                                                                                                                                                                                                                                                                                                                                                    |
| Complete List of Authors:     | <p>McCabe, John; University College Dublin, Stroke Clinical Trials Network Ireland</p> <p>Giannotti, Nicola; University College Dublin, Radiography &amp; Diagnostic Imaging, School of Medicine</p> <p>McNulty, Jonathan; University College Dublin, Radiography &amp; Diagnostic Imaging, School of Medicine, University College Dublin, Ireland.</p> <p>Collins, Sean; Health Research Board Stroke Clinical Trials Network Ireland (HRB SCTNI)</p> <p>Coveney, Sarah; Health Research Board Stroke Clinical Trials Network Ireland (HRB SCTNI); Mater Misericordiae University Hospital, Neurovascular Clinical Science Unit, Stroke Service and Department of Neurology</p> <p>Murphy, Sean; Health Research Board Stroke Clinical Trials Network Ireland (HRB SCTNI); Mater Misericordiae University Hospital, Neurovascular Clinical Science Unit, Stroke Service and Department of Neurology</p> <p>Barry, Mary; St Vincent's University Hospital, Vascular Surgery</p> <p>Harbison, Joseph; St James Hospital; Health Research Board Stroke Clinical Trials Network Ireland (HRB SCTNI)</p> <p>Cronin, Simon; Health Research Board Stroke Clinical Trials Network Ireland (HRB SCTNI); Cork University Hospital Group, Department of Neurology</p> <p>Williams, David; Health Research Board Stroke Clinical Trials Network Ireland (HRB SCTNI); Beaumont Hospital, Department of Stroke</p> <p>Horgan, Gillian; Health Research Board Stroke Clinical Trials Network Ireland (HRB SCTNI); Mater Misericordiae University Hospital, Neurovascular Clinical Science Unit, Stroke Service and Department of Neurology</p> <p>Dolan, Eamon; Health Research Board Stroke Clinical Trials Network Ireland (HRB SCTNI); James Connolly Memorial Hospital, Department of Geriatric Medicine</p> <p>Cassidy, Tim; St Vincent's University Hospital, Geriatric Medicine; Health Research Board Stroke Clinical Trials Network Ireland (HRB SCTNI)</p> <p>McDonnell, Ciaran; Mater Misericordiae University Hospital, Department of Vascular Surgery</p> <p>Kavanagh, Eoin; Mater Misericordiae University Hospital, Department of Radiology</p> <p>Foley, Shane; University College Dublin, Radiography &amp; Diagnostic</p> |



|                                 |                                                                                                                                                                                                                                                                                                                                                                                                                                                                                                                                                          |
|---------------------------------|----------------------------------------------------------------------------------------------------------------------------------------------------------------------------------------------------------------------------------------------------------------------------------------------------------------------------------------------------------------------------------------------------------------------------------------------------------------------------------------------------------------------------------------------------------|
|                                 | Imaging, School of Medicine<br>O'Connell, Martin; Mater Misericordiae University Hospital, Department of Radiology<br>Marnane, Michael; Mater Misericordiae University Hospital, Stroke Clinical Trials Network Ireland; University College Dublin, Neurovascular Clinical Science Unit, Stroke Service and Department of Neurology<br>Kelly, Peter ; Health Research Board Stroke Clinical Trials Network Ireland (HRB SCTNI); Mater Misericordiae University Hospital, Neurovascular Clinical Science Unit, Stroke Service and Department of Neurology |
| <b>Primary Subject Heading</b>: | Neurology                                                                                                                                                                                                                                                                                                                                                                                                                                                                                                                                                |
| Secondary Subject Heading:      | Diagnostics                                                                                                                                                                                                                                                                                                                                                                                                                                                                                                                                              |
| Keywords:                       | Stroke < NEUROLOGY, Cardiovascular imaging < RADIOLOGY & IMAGING, PREVENTIVE MEDICINE, Adult neurology < NEUROLOGY                                                                                                                                                                                                                                                                                                                                                                                                                                       |
|                                 |                                                                                                                                                                                                                                                                                                                                                                                                                                                                                                                                                          |

SCHOLARONE™  
Manuscripts



I, the Submitting Author has the right to grant and does grant on behalf of all authors of the Work (as defined in the below author licence), an exclusive licence and/or a non-exclusive licence for contributions from authors who are: i) UK Crown employees; ii) where BMJ has agreed a CC-BY licence shall apply, and/or iii) in accordance with the terms applicable for US Federal Government officers or employees acting as part of their official duties; on a worldwide, perpetual, irrevocable, royalty-free basis to BMJ Publishing Group Ltd ("BMJ") its licensees and where the relevant Journal is co-owned by BMJ to the co-owners of the Journal, to publish the Work in this journal and any other BMJ products and to exploit all rights, as set out in our [licence](#).

The Submitting Author accepts and understands that any supply made under these terms is made by BMJ to the Submitting Author unless you are acting as an employee on behalf of your employer or a postgraduate student of an affiliated institution which is paying any applicable article publishing charge ("APC") for Open Access articles. Where the Submitting Author wishes to make the Work available on an Open Access basis (and intends to pay the relevant APC), the terms of reuse of such Open Access shall be governed by a Creative Commons licence – details of these licences and which [Creative Commons](#) licence will apply to this Work are set out in our licence referred to above.

Other than as permitted in any relevant BMJ Author's Self Archiving Policies, I confirm this Work has not been accepted for publication elsewhere, is not being considered for publication elsewhere and does not duplicate material already published. I confirm all authors consent to publication of this Work and authorise the granting of this licence.

**TITLE PAGE**

Cohort profile: BIOVASC-Late, A Prospective Multi-Centred Study of Imaging and Blood Biomarkers of Carotid Plaque Inflammation and Risk of Late Vascular Recurrence after Non-severe Stroke in Ireland

**Authors**

McCabe JJ<sup>1,2</sup>, Giannotti N<sup>3</sup>, McNulty JP<sup>3</sup>, Collins S<sup>1,2</sup>, Coveney S<sup>1,2</sup>, Murphy S<sup>1,2</sup>, Barry M<sup>4</sup>, Harbison J<sup>1,5</sup>, Cronin S<sup>1,6</sup>, Williams DJ<sup>1,7</sup>, Horgan G<sup>1,2</sup>, Dolan E<sup>1,8</sup>, Cassidy T<sup>1,9</sup>, McDonnell C<sup>10</sup>, Kavanagh E<sup>11</sup>, Foley S<sup>3</sup>, O'Connell M<sup>11</sup>, Marnane M<sup>1,2</sup>, Kelly PJ<sup>1,2</sup>.

**Affiliations:**

<sup>1</sup> Health Research Board, Stroke Clinical Trials Network Ireland SCTNI, Dublin, Ireland.

<sup>2</sup> Neurovascular Clinical Science Unit, Stroke Service and Department of Neurology, Mater Misericordiae University Hospital, Dublin, Ireland .

<sup>3</sup> Radiography & Diagnostic Imaging, School of Medicine, University College Dublin, Ireland.

<sup>4</sup> Department of Vascular Surgery, St Vincent's University Hospital, Dublin, Ireland.

<sup>5</sup> Stroke Service, Department of Geriatric Medicine, St James' Hospital, Dublin, Ireland.

<sup>6</sup> Department of Neurology, Cork University Hospital, Ireland and Department of Clinical Neuroscience, College of Medicine and Health, University College Cork, Ireland.

<sup>7</sup> Department of Geriatric and Stroke Medicine, Royal College of Surgeons in Ireland/Beaumont Hospital Dublin Ireland.

<sup>8</sup> James Connolly Memorial Hospital, Dublin, Ireland.

<sup>9</sup> Department of Geriatric Medicine, St Vincent's University Hospital, Dublin, Ireland.

<sup>10</sup> Department of Vascular Surgery, Mater Misericordiae University Hospital, Dublin, Ireland.

<sup>11</sup> Department of Radiology, Mater Misericordiae University Hospital and University College Dublin Ireland.

**Corresponding author:** Dr John McCabe, Health Research Board Stroke Clinical Trials Network Ireland, UCD Clinical Research Centre, Catherine McAuley Centre, Nelson Street, Dublin 7. E-mail: [mccabej1@tcd.ie](mailto:mccabej1@tcd.ie).

1  
2  
3 **Word Count:** 6,016 (abstract, main text, strengths and limitations, further details and  
4 references)  
5  
6  
7

8 **Keywords:** stroke, transient ischaemic attack, carotid, atherosclerosis, plaque, recurrence,  
9 inflammation, 18-FDG positron-emission tomography.  
10  
11  
12  
13  
14  
15  
16  
17  
18  
19  
20  
21  
22  
23  
24  
25  
26  
27  
28  
29  
30  
31  
32  
33  
34  
35  
36  
37  
38  
39  
40  
41  
42  
43  
44  
45  
46  
47  
48  
49  
50  
51  
52  
53  
54  
55  
56  
57  
58  
59  
60

For peer review only

## ABSTRACT

**Purpose:** Inflammation is important in stroke. Anti-inflammatory therapy reduces vascular events in coronary patients.  $^{18}\text{F}$ -fluorodeoxyglucose positron emission tomography ( $^{18}\text{F}$ -FDG-PET) identifies plaque inflammation-related metabolism. However, long-term prospective cohort studies investigating the association between carotid plaque inflammation, identified on  $^{18}\text{F}$ -FDG PET, and the risk of recurrent vascular events, have not yet been undertaken in stroke patients.

**Participants:** The Biomarkers Imaging Vulnerable Atherosclerosis in Symptomatic Carotid disease (BIOVASC) study and Dublin Carotid Atherosclerosis Study (DUCASS) are 2 prospective multi-centred observational cohort studies, employing near-identical methodologies, which recruited 285 patients between 2008-2016 with non-severe stroke/transient ischaemic attack and ipsilateral carotid stenosis (50-99%). Patients underwent co-registered carotid  $^{18}\text{F}$ -FDG PET/computerised tomography angiography (CTA) and phlebotomy for measurement of inflammatory cytokines. Plaque  $^{18}\text{F}$ -FDG-uptake is expressed as maximum standardized uptake value ( $\text{SUV}_{\text{max}}$ ) and tissue-to-background ratio. The BIOVASC-Late study is a follow-up study (median 7 years) of patients recruited to the DUCASS/BIOVASC cohorts.

**Findings to date:** We have reported that  $^{18}\text{F}$ -FDG-uptake in atherosclerotic plaques of patients with symptomatic carotid stenosis predicts early recurrent stroke, independent of luminal narrowing. The incorporation of  $^{18}\text{F}$ -FDG plaque uptake into a clinical prediction model also improves discrimination of early recurrent stroke, when compared with risk stratification by luminal stenosis alone. However, the relationship between  $^{18}\text{F}$ -FDG-uptake and late vascular events has not been investigated to date.

**Future plans:** The primary aim of BIOVASC-Late is to investigate the association between  $\text{SUV}_{\text{max}}$  in symptomatic 'culprit' carotid plaque (as a marker of systemic inflammatory atherosclerosis) and the composite outcome of any late major vascular event (recurrent ischaemic stroke, coronary event, or vascular death). Secondary aims are to investigate associations between: (i)  $\text{SUV}_{\text{max}}$  in symptomatic plaque, and individual vascular endpoints (ii)  $\text{SUV}_{\text{max}}$  in asymptomatic contralateral carotid plaque and  $\text{SUV}_{\text{max}}$  in ipsilateral symptomatic

1  
2  
3 plaque (iii)  $SUV_{max}$  in asymptomatic carotid plaque and major vascular events (iv)  
4 inflammatory cytokines and vascular events.  
5  
6  
7

### 8 **Strengths and limitations of this study**

9

- 10 • BIOVASC-Late is the first study to investigate the prognostic utility of  $^{18}F$ -FDG PET-  
11 CTA for late outcome vascular events in stroke patients.  
12
- 13 • Long-term data on the prognostic role of imaging/blood biomarkers of inflammation will  
14 help inform the need for future RCTs of anti-inflammatory therapies for secondary  
15 prevention in stroke patients.  
16
- 17 • The study has a fixed sample size, which means that the analyses for some secondary  
18 outcomes may be underpowered.  
19
- 20 • PET-CTA has certain limitations as a plaque-imaging modality, primarily its limited  
21 spatial resolution, high monetary costs, radiation exposure and inability to identify  
22 potentially relevant plaque features (eg. intraplaque hemorrhage or surface ulceration),  
23 which have been associated with stroke recurrence.  
24
- 25 • The majority of patients enrolled in this study are older males. This may limit the  
26 generalisability of its findings.  
27  
28  
29  
30  
31  
32  
33  
34  
35  
36  
37  
38  
39  
40  
41  
42  
43  
44  
45  
46  
47  
48  
49  
50  
51  
52  
53  
54  
55  
56  
57  
58  
59  
60

## INTRODUCTION

Stroke remains a leading cause of death, disability and dementia worldwide.(1) Despite modern secondary prevention therapy, the risk of recurrent major vascular events after ischaemic stroke is in the region of 25-30% over 5 years. (2) There is an urgent and growing need for new therapeutic targets for secondary prevention.

Clinico-pathological studies implicate inflammation in plaque destabilisation and stroke pathogenesis.(3-5) Randomised control trials of anti-inflammatory therapy in patients with coronary disease have recently been shown to reduce the risk of recurrent vascular events (6-8), but not all studies have replicated these findings.(9) The LoDoCO and COLCOT trials have both shown that colchicine reduces the risk of major vascular events in patients with coronary disease.(6, 7) The CANTOS trial also showed that interleukin-1 $\beta$  inhibition with canakinumab reduced the risk of vascular events in patients with stable coronary disease.(8) The CIRT trial compared low-dose methotrexate to placebo in patients with stable coronary disease but no benefit was shown.(9) CONVINCENCE (COLchicine for prevention of Vascular Inflammation in Non-Cardioembolic stroke trial) is the first prevention trial to investigate whether anti-inflammatory therapy might reduce the risk of vascular events in stroke patients and recruitment is currently ongoing (ClinicalTrials.gov Identifier: NCT02898610).

However, the prognostic role of inflammatory biomarkers in stroke patients is uncertain. Better data is needed to strengthen the rationale for future prevention trials of anti-inflammatory therapy in stroke survivors. BIOVASC and DUCASS are 2 prospective multi-centred cohort studies of patients with symptomatic carotid disease, which employed near-identical methodologies, and examined the relationship between blood and imaging biomarkers of inflammation and the risk of early recurrent stroke. The BIOVASC-Late study is a late follow-up study (range 3-12 years, median 7 years) of patients recruited to the DUCASS/BIOVASC cohorts.

### **Prognostic role of imaging biomarkers of vascular inflammation**

<sup>18</sup>F-FDG PET is a validated technique for non-invasive imaging of inflammation-related plaque metabolism and is associated with histological evidence of inflammation in resected human carotid plaque specimens.(10, 11) <sup>18</sup>F-FDG uptake in one artery is strongly associated with <sup>18</sup>F-FDG uptake in neighbouring arteries, suggesting that plaque inflammation measured by PET might be a surrogate marker of a systemic inflammatory atherosclerotic plaque burden.(12) Several large studies have shown that <sup>18</sup>F-FDG arterial uptake in patients without a history of vascular disease is associated with future cardiovascular events independent of other vascular risk factors.(13, 14) However, the association between atherosclerotic plaque inflammation measured by <sup>18</sup>F-FDG-PET, in recently symptomatic stroke patients, and the risk of late major vascular events has heretofore not been studied.

### **Prognostic role of circulating blood biomarkers of inflammation**

Circulating blood biomarkers of inflammation, such as C-reactive Protein (CRP) and fibrinogen, are both associated with first stroke in patients without a history of vascular disease.(15-17) However, studies investigating the prognostic role of inflammatory cytokines in stroke survivors have shown conflicting results and require further investigation. (18-23) Furthermore, few data exist on the cross-sectional association between circulating inflammatory cytokines and carotid plaque inflammation-related hypermetabolism (measured by <sup>18</sup>F-FDG PET) in recently symptomatic stroke patients.

### **Aims**

The primary aim of BIOVASC-Late is to investigate the association between <sup>18</sup>F-FDG uptake in carotid plaques of recently symptomatic ischaemic stroke/transient ischaemic attack (TIA) patients and the risk of any late major cardiovascular event defined as a composite of non-fatal ischaemic stroke, myocardial infarction (MI), unstable angina requiring hospitalisation, non-fatal cardiac arrest or vascular death (see Figure 1), occurring 30 days after the index event.

Our secondary aims are:

- To investigate the association between <sup>18</sup>F-FDG uptake in ipsilateral ('culprit') plaque in ischaemic stroke/TIA patients and the risk of the individual components of the primary endpoint.



- To investigate the cross-sectional association between  $^{18}\text{F}$ -FDG uptake in the ipsilateral ('culprit') carotid artery of ischaemic stroke/TIA patients and  $^{18}\text{F}$ -FDG uptake in the contralateral asymptomatic ('non-culprit') carotid artery.
- To investigate the association between  $^{18}\text{F}$ -FDG uptake in the asymptomatic contralateral ('non-culprit') carotid artery and the risk of the composite vascular outcome.
- To investigate the association between inflammatory cytokines measured acutely, at the time of the index event, and the risk of late vascular events.

Exploratory aims will include:

To investigate the associations between:

- Inflammatory cytokines, measured acutely, and  $^{18}\text{F}$ -FDG uptake in ipsilateral symptomatic and contralateral asymptomatic carotid artery.
- Inflammatory cytokines, measured acutely, with levels of inflammatory cytokines measured at late follow-up.
- $^{18}\text{F}$ -FDG uptake in symptomatic 'culprit' carotid plaque in ischaemic stroke/TIA patients and outcome events due peripheral arterial disease.
- $^{18}\text{F}$ -FDG uptake in symptomatic 'culprit' carotid plaque and late-outcome ipsilateral ischaemic stroke.

## COHORT DESCRIPTION

### DUCASS: Eligibility

DUCASS is a multi-centred prospective observational cohort study, which recruited 77 patients from 2008-2012 from 4 centres in Ireland. Inclusion criteria were: (1) recent ( $\leq 14$  days) TIA, non-severe stroke (modified Rankin Scale (mRS)  $\leq 3$ ), or retinal artery embolism; (2) ipsilateral non-occlusive internal carotid stenosis ( $\geq 50\%$  luminal narrowing) identified by duplex ultrasound (confirmed by CTA and/or magnetic resonance angiography (MRA)). Exclusion criteria were: (1) pregnancy; (2) age  $< 50$  years; (3) active malignancy; (4) prior neck irradiation; (5) prior ipsilateral carotid endarterectomy/stenting; (6) ipsilateral carotid occlusion; (7) dementia (8) haemodynamic stroke/TIA due to carotid near-occlusion, and (9) significant renal impairment (estimated glomerular filtration rate  $< 60$ mls/minute) or other contraindication to contrast-enhanced CT or magnetic resonance imaging (MRI). Patients

1  
2  
3 were followed up at at 7, 30, 90 days, 1 and 2 years, either by telephone contact or by in-  
4 person assessment.  
5  
6

### 7 **BIOVASC: Eligibility**

8  
9  
10 BIOVASC is a multi-centre prospective cohort study conducted in 10 centres in Ireland (6  
11 sites), Barcelona, Paris, Calgary, and Singapore (1 site each), which recruited 208 patients  
12 from 2012-2016. Eligibility criteria were identical to DUCASS, apart from an extension of  
13 the time-window from presenting event to enrolment to 30 days. Patients were initially  
14 followed up at 7, 30, 90 days and 1 year, either by telephone contact or by in-person  
15 assessment. A flow diagram illustrating the screening and recruitment process for both  
16 studies are illustrated in Figure 2.  
17  
18  
19  
20  
21  
22

### 23 **Baseline Study Procedures: Co-variates**

24  
25  
26 The following information was recorded at recruitment: patient demographics, qualifying  
27 event, National Institute for Health Stroke Scale (NIHSS) score, mRS, ABCD2 score,  
28 medications at time of index event and recruitment, history of smoking, hypertension,  
29 hyperlipidaemia, coronary heart disease, atrial fibrillation, peripheral arterial disease, and  
30 prior stroke or TIA. Hypertension, hyperlipidaemia, and diabetes mellitus were each defined  
31 according to self-reported history, medical record documentation, new diagnosis at  
32 recruitment or if the patient was taking anti-hypertensives, lipid-lowering or glucose-  
33 lowering medications. Atrial fibrillation was defined according to self-reported history,  
34 medical record documentation or if newly diagnosed during hospital admission for the index  
35 event. Peripheral arterial disease was defined as medical record or self-reported history of  
36 intermittent claudication, abdominal artery aneurysm, or prior peripheral/extra-cranial  
37 revascularisation procedure. Coronary heart disease was defined as medical record or self-  
38 reported history of MI, angina, or coronary revascularisation.  
39  
40  
41  
42  
43  
44  
45  
46  
47  
48  
49

### 50 **Baseline Study Procedures: Phlebotomy**

51  
52  
53 In both studies, patients underwent phlebotomy within 72 hours of enrolment. Serum and  
54 plasma samples were transferred to a central laboratory and centrifuged at 1600 revolutions  
55 per minute for 20 minutes as soon as possible (target <2 hours) and stored at -80 degrees  
56 Celsius.  
57  
58  
59  
60

### Baseline Study Procedures: PET-CT

Standardisation and quality assurance of PET-CT imaging were achieved by 3 methods: (1) internal PET scanner quality assurance checks using standard phantoms;(24, 25) (2) adherence to a prespecified standardized protocol; and (3) sensitivity analyses to verify the consistency of results across participating centers. <sup>18</sup>F-FDG PET-CTA was performed within 7 days (<14 days in DUCASS) of study entry, after a minimum 6-hour fast. PET scans were not performed if pre-PET blood glucose exceeded 10 mmol/L. We administered 320MBq of <sup>18</sup>F-FDG 2 hours before image acquisition to allow sufficient image quality and adequate time for arterial FDG-uptake. This approach is in line with recommendations by the European Association of Nuclear Medicine (EANM).(26) The uptake phase was standardised with the patient resting. PET images were acquired in a 3-dimensional mode in 2-bed positions for 10 minutes each. After PET, a low-dose CT for attenuation correction was performed using the same scanner followed by the aortic arch to skull-base carotid CTA using contrast-bolus tracking. The PET-CT image acquisition parameters were near-identical in the BIOVASC and DUCASS studies.

Before commencing the analysis, semi-automated co-registration of PET and CT images are performed, the details of which have been described elsewhere.(25) For symptomatic carotid arteries <sup>18</sup>F-FDG activity in 10 regions of interest are defined relative to the slice of maximal stenosis. In the asymptomatic contralateral carotid artery, 30 regions of interest are identified extending superiorly from the carotid bifurcation. <sup>18</sup>F-FDG activity is quantified using standardized uptake values ( $SUV [g/mL] = \text{measured uptake [MBq/mL]} / \text{injected dose [MBq]} / \text{patient weight [g]}$ ). We define the single 'hottest slice' (SHS) as the axial slice with maximal SUV uptake ( $SUV_{max}$ ) and the most diseased segment (MDS) as the single hottest slice plus the adjacent proximal and distal axial slices, corresponding to vessel area 3mm in length (see Figure 3, Figure 4(a) and Figure 4(b).(27) All images are centrally analysed by a single trained reader. Intra-rater reliability assessment showed excellent agreement (intraclass correlation  $\alpha = 0.814$ ,  $P < 0.001$ ).(25) For all analyses relating to plaque inflammation-related metabolism,  $SUV_{max}$  will be considered as the primary exposure variable of interest. As part of a sensitivity analysis, a whole-artery approach to calculating  $SUV_{max}$  will be used to assess the relationship between target vessel inflammation in asymptomatic carotid arteries and risk of the composite outcome. Furthermore, the analyses will be repeated using tissue-to-background-ratio (TBR) as an alternative metric of <sup>18</sup>F-FDG uptake. The

1  
2  
3 TBR<sub>max</sub> is calculated as the ratio of SUV<sub>max</sub> and venous blood pool mean SUV<sub>mean</sub> to correct  
4 for blood-pool uptake. These additional analyses will be performed in keeping with EANM  
5 guidelines.(26)  
6  
7

8  
9 Our rationale for using SUV<sub>max</sub> in the SHS and MDS as the primary exposure of interest is to  
10 ensure that focal areas of vessel wall inflammation are identified and not “averaged-out” by a  
11 whole-artery approach. The recent guidelines have outlined the strengths and limitations of  
12 both approaches. SUV<sub>max</sub> measurements in plaques reflect the part of the lesion with the  
13 highest FDG uptake. However, the level of noise in the image and the adjacent blood signal  
14 (spill-in of adjacent activity related to partial volume effects) can influence measurements of  
15 SUV<sub>max</sub>. The use of TBR over SUV has been favoured by some due to its reliability across  
16 imaging acquisition times and tracer circulation times, whilst other studies have shown no  
17 additional benefit with blood background correction.(26, 28) Given the uncertainty we have  
18 chosen to evaluate both methods to ensure consistency of our findings.  
19  
20  
21  
22  
23  
24  
25  
26  
27

### 28 **BIOVASC-Late: Study Design and Procedures**

29  
30 The BIOVASC-Late study is an extended follow-up study of patients recruited to the DUCASS  
31 and BIOVASC cohorts. Participating centres will be limited to the Irish study sites. Patients  
32 recruited to the original studies will be invited to participate in a single in-person follow-up  
33 assessment (see Figure 5). Consenting patients and/or their caregivers will undergo a  
34 standardised interview for any symptoms suspicious for recurrent stroke/TIA, unstable angina,  
35 MI, non-fatal cardiac arrest or peripheral arterial disease. Functional outcome will be assessed  
36 using the Barthel index and the mRS (using a validated standardised algorithm).(29, 30)  
37 Patients who have died since last follow-up will have outcome events recorded by multiple-  
38 overlapping methods including contact with the participant’s general practitioner, review of  
39 hospital records and death certification. Surviving patients will also undergo a comprehensive  
40 cognitive evaluation as part of a cognitive sub-study, the protocol of which will be described  
41 separately.  
42  
43  
44  
45  
46  
47  
48  
49  
50  
51

52 Patients will also undergo late phlebotomy, which will be processed in an identical manner to  
53 baseline samples taken at recruitment. Patients will be carefully screened for active infection,  
54 inflammatory conditions, active malignancy, recent trauma or surgical procedures (<1 month),  
55 and in suspected cases phlebotomy will be deferred, where possible, until such time as the  
56 condition has resolved. Baseline and late serum samples will be analysed by a trained  
57  
58  
59  
60

laboratory scientist, blinded to baseline clinical data, for circulating blood biomarkers of inflammation. CRP will be analysed in serum by immunoturbidimetric detection using the high-sensitive MULTIGENT CRP Vario assay (Abbott Laboratories, Illinois, USA). Interleukin-1 $\beta$  (IL-1 $\beta$ ), IL-6, IL-8, IL10, IL-12p70, Interferon- $\gamma$  (IFN- $\gamma$ ), Tumour Necrosis Factor- $\alpha$  (TNF- $\alpha$ ), will be assessed by electro-chemi-luminescent detection, using a commercially available 96 well-plate Human Pro-Inflammatory multi-Plex Ultra Sensitive Kit (Merck Sharp & Dohme, Maryland, USA). MCP-1 will be analysed using an enzyme-linked immunosorbent assay (Thermo Fisher Scientific, Massachusetts, USA).

### Outcome Definitions

Suspected outcome events will be confirmed by in-person evaluation by a study investigator and by medical record review. Any suspected stroke or cardiovascular outcome event will then be independently adjudicated by the principal investigator (PK), blinded to baseline data.

Recurrent stroke will be defined as a sudden-onset worsened neurological deficit lasting greater than 24 hours occurring after <sup>18</sup>F-FDG PET-CTA. Gradual progression of an existing neurological deficit, sub-clinical detection of new infarction on neuroimaging, or deterioration due to cerebral oedema, large haemorrhagic transformation, seizure, metabolic disturbance or other illness will be excluded. Only recurrent strokes unrelated to a revascularisation procedure (defined as before or later than 24 hours of carotid revascularisation) will be defined as outcomes. MI will be defined according to the third universal definition.<sup>(31)</sup> Unstable angina requiring hospitalisation will be defined according to consensus criteria outlined by the Standardized Data Collection for Cardiovascular Trials Initiative and the US Food and Drug Administration (FDA).<sup>(32)</sup> Non-fatal cardiac arrest will be defined as recovery from sudden collapse, with electrocardiogram (ECG) rhythm-strip verified cardiac asystole, ventricular tachycardia, or ventricular fibrillation. Vascular death will be defined as sudden cardiac death, fatal myocardial infarction, fatal ischaemic stroke, or death due to mesenteric ischaemia or peripheral arterial disease. Peripheral arterial endpoints will include acute limb ischaemia, peripheral arterial revascularisation, mesenteric ischaemia, or peripheral amputation for vascular causes. Acute limb ischaemia will refer to hospitalisation for a rapid or sudden decrease in limb perfusion and either: 1) a new pulse deficit, rest pain, pallor, paraesthesia or paralysis; or 2) confirmation of arterial obstruction by limb haemodynamics (ankle or toe pressure), imaging, intraoperative findings, or

pathological evaluation. Peripheral revascularisation will be defined as any peripheral procedure performed to treat limb ischaemia or prevent major limb ischemic events and will include endovascular or surgical revascularisation as well as amputation, but will not include carotid artery revascularisation. Mesenteric ischaemia will be defined as imaging or autopsy evidence of small or large bowel ischaemic infarction.

### Baseline clinical characteristics of study participants

The baseline clinical characteristics of DUCASS and BIOVASC, as well as the pooled dataset of BIOVASC-Late, are outlined in Table 1. Baseline characteristics of both cohorts were similar, apart from a higher rate of atrial fibrillation and a slightly greater degree of stroke-severity in DUCASS. A greater proportion of patients in BIOVASC were taking anti-platelet medications and a lower proportion taking anti-coagulants at the time of recruitment, compared with patients in DUCASS.

Table 1: Baseline characteristics of BIOVASC and DUCASS study cohorts

|                               | BIOVASC-Late<br>Pooled Data<br>(n=285) | DUCASS<br>(n=77) | BIOVASC<br>(n=208) | P value |
|-------------------------------|----------------------------------------|------------------|--------------------|---------|
| <b>Demographics (n=285)</b>   |                                        |                  |                    |         |
| Age                           | 69.8 (9.8)                             | 70.6 (10.3)      | 69.5 (9.6)         | 0.4     |
| Sex, male                     | 68.4 (195)                             | 68.8% (53)       | 68.3 (142)         | 0.93    |
| Ethnicity, Caucasian          | 100 (285)                              | 100 (77)         | 100 (208)          | 1       |
| <b>Index event (n=285)</b>    |                                        |                  |                    |         |
| TIA                           | 39.6 (113)                             | 40.3 (31)        | 39.4 (82)          | 0.83    |
| Ischaemic stroke              | 43.9 (125)                             | 45.4 (35)        | 43.3 (90)          |         |
| Retinal embolism              | 16.5 (47)                              | 14.3 (11)        | 17.3 (36)          |         |
| <b>Smoking status (n=284)</b> |                                        |                  |                    |         |
| Current                       | 40.8 (116)                             | 39 (30)          | 41.6 (86)          | 0.88    |
| Previous                      | 40.5 (115)                             | 42.9 (33)        | 39.6 (82)          |         |
| Never                         | 18.7 (53)                              | 18.2 (14)        | 18.8 (39)          |         |
| <b>Other risk factors</b>     |                                        |                  |                    |         |
| Hypertension (n=284)          | 88 (250)                               | 90.9 (70)        | 87 (180)           | 0.36    |

|                                                    |            |           |            |        |
|----------------------------------------------------|------------|-----------|------------|--------|
| Diabetes Mellitus<br>(n=284)                       | 16.9 (48)  | 19.5 (15) | 15.9 (33)  | 0.48   |
| Hyperlipidaemia (n=285)                            | 78.6 (224) | 77.9 (60) | 78.8 (164) | 0.87   |
| Atrial fibrillation (n=284)                        | 14.4 (41)  | 23.4 (18) | 11.1 (23)  | 0.01   |
| Coronary heart disease<br>(n=284)                  | 32 (91)    | 35.1 (27) | 30.9 (64)  | 0.51   |
| Peripheral arterial disease<br>(n=284)             | 9.5 (27)   | 13 (10)   | 8.2 (17)   | 0.22   |
| <b>Medications &amp; therapeutic interventions</b> |            |           |            |        |
| Statin at index event<br>(n=284)                   | 50 (142)   | 45.5 (35) | 51.7 (107) | 0.35   |
| Statin at recruitment<br>(n=284)                   | 92.6 (263) | 94.8 (73) | 91.8 (190) | 0.39   |
| High-intensity statin at<br>recruitment (n=279)    | 63.8 (178) | 63.9 (46) | 63.8 (132) | 0.99   |
| Antiplatelet at index<br>event (n=284)             | 46.8 (133) | 50.6 (39) | 45.4 (94)  | 0.43   |
| Anti-platelet at<br>recruitment (n=283)            | 92.6 (262) | 85.5 (65) | 95.2 (197) | 0.01   |
| Anticoagulant at index<br>event (n=284)            | 5.6 (16)   | 6.5 (5)   | 5.3 (11)   | 0.7    |
| Oral anticoagulant at<br>recruitment (n=284)       | 8.8 (25)   | 16.9 (13) | 5.8 (12)   | 0.003  |
| IV tpa (n=284)                                     | 6.7 (19)   | 3.9 (3)   | 7.7 (16)   | 0.25   |
| EVT (n=284)                                        | 0 (0)      | 0 (0)     | 0 (0)      | 1      |
| Carotid endarterectomy<br>(n=284)                  | 64.1 (182) | 53.3 (41) | 68.1 (141) | 0.02   |
| Carotid stenting (n=284)                           | 2.5 (7)    | 1.3 (1)   | 2.9 (6)    | 0.44   |
| <b>Stroke severity, median (IQR)</b>               |            |           |            |        |
| NIHSS (n=281)                                      | 0 (0-2)    | 1 (0-2)   | 0 (0-1)    | <0.001 |
| Modified Rankin Scale<br>(n=282)                   | 0 (0-1)    | 1 (0-2)   | 0 (0-1)    | 0.002  |
| <b>Stenosis severity (n=285)</b>                   |            |           |            |        |

|                |            |           |           |      |
|----------------|------------|-----------|-----------|------|
| Moderate       | 46.7 (133) | 61 (47)   | 41.4 (86) | 0.8* |
| Severe         | 43.5 (124) | 28.6 (22) | 49 (102)  |      |
| Near-occlusion | 9.8 (28)   | 10.4 (8)  | 9.6 (20)  |      |

Categorical data expressed as % (number). Continuous data expressed as mean (Standard Deviation) unless otherwise stated.  $\chi^2$  test is used for comparing differences in proportions. 2 sample t-test is used or the Mann-Whitney U test was used for continuous data as appropriate. The chi-squared statistical test for trend was used for comparing proportions in ordered categorical data (>2 groups). Table legend: IV tpa, intravenous tissue plasminogen activator; evt, endovascular therapy; IQR, interquartile range. \* p value for chi-squared statistical test for trend.

### Patient and public involvement

Patients were not involved in the design of either study. However, since the study was initiated the Stroke Clinical Trials Network Ireland (SCTNI) has developed a formal strategy for patient-public involvement (PPI) and has formally recruited designated patient ambassadors, who will be consulted prior to dissemination of the study's results to participating patients.

### Statistical Analysis Plan

Clinical characteristics will be compared using t tests, Mann-Whitney, or  $\chi^2$  tests. Non-parametric tests will be used where data is not normally distributed. The plaque SUV<sub>max</sub> will be the exposure variable for hypothesis testing. Bivariate and multivariable Cox regression will be performed to determine factors associated with dichotomous outcomes, associated with 1 g/mL increase in SUV<sub>max</sub> in culprit/non-culprit plaque, with censoring at the time of a recurrent vascular event, last follow-up visit or death. Cox proportional hazard regression will be used to estimate the unadjusted hazard ratio for SUV<sub>max</sub> with time-to-event as the dependent variable. The proportional hazard assumption will be tested by visual examination of survival curves and by the Schoenfeld test. Forward stepwise multivariable Cox regression will be used to estimate the adjusted hazard ratio for the biomarker level after adjusting for potential confounding variables. Independent variables will be included in the model based on a p-value of  $\leq 0.05$  on bivariate analysis or a known clinical rationale for association with stroke recurrence (eg. age, hypertension, statin use, smoking) regardless of its association on bivariate analysis. The rationale for this approach is to fully adjust for any potential



1  
2  
3 confounders. Associations between continuous variables will be analysed using Pearson's  
4 correlation coefficient for biomarkers with a normal distribution and Spearman's correlation  
5 test for biomarkers with a non-normal distribution. Simple linear regression analysis will be  
6 used to explore the associations between  $SUV_{max}$  (outcome variable) and inflammatory  
7 cytokines (explanatory variables). All significance testing will be 2-sided, with a p value of  
8  $<0.05$  considered significant. All analyses will be performed using Stata Version 15.0.  
9  
10  
11  
12  
13  
14

15 As this is a follow-up study the sample size for the primary hypothesis is fixed. Assuming a  
16 10% loss to follow-up and a rate of recurrent vascular events in the region of 6% per year,(2)  
17 the study will have 83% power to detect a hazard ratio of 2, per unit rise in  $SUV_{max}$ , for the  
18 composite primary outcome of any major vascular event. This calculation is based on the  
19 observed baseline standard deviation of  $SUV_{max}$  in the sample.  
20  
21  
22  
23  
24  
25

## 26 **FINDINGS TO DATE**

27  
28 Patients recruited to BIOVASC and DUCASS underwent carotid  $^{18}F$ -FDG PET-CTA shortly  
29 after enrolment. Both studies showed that increased plaque  $^{18}F$ -FDG uptake was  
30 independently associated with early recurrent stroke at 90 days.(33, 34) The incorporation of  
31  $^{18}F$ -FDG plaque uptake into a clinical prediction model also improves discrimination of early  
32 recurrent stroke, when compared with risk stratification by luminal stenosis alone.(35)  
33 Improved methods to identify patients at the highest risk of stroke may refine selection for  
34 carotid revascularisation, allowing surgery to be targeted towards patients most likely to  
35 benefit. These findings show that plaque inflammation is a clinically important and  
36 independent predictor of early stroke recurrence in symptomatic carotid disease.  
37  
38  
39  
40  
41  
42  
43  
44

## 45 **STRENGTHS AND LIMITATIONS**

46  
47 An increasing body of evidence supports the hypothesis that inflammation plays an important  
48 role in stroke.(36) However, prospectively designed multi-centred studies relating blood and  
49 imaging biomarkers of inflammation to late outcome vascular events in stroke patients are  
50 lacking. Whilst results from RCTs of anti-inflammatory agents in coronary patients have  
51 shown recent promise, better data is needed to inform the need for future trials of anti-  
52 inflammatory agents in a stroke population.  
53  
54  
55  
56  
57

58 To our knowledge, BIOVASC-Late is the first multi-centred observational study to  
59 investigate the prognostic utility of  $^{18}F$ -FDG PET-CTA for late outcome vascular events in  
60

1  
2  
3 stroke patients. It will also contribute important observations regarding the cross-sectional  
4 relationship between plaque FDG-uptake and (i) circulating inflammatory cytokines  
5 measured shortly after an acute stroke/TIA and (ii) FDG-uptake in the contralateral  
6 asymptomatic carotid artery. Other strengths of the study include an in-person evaluation of  
7 suspected outcome events, blinded outcome assessments, rigorous quality assurance  
8 protocols to ensure standardisation of image acquisition, and a centralised/blinded image  
9 analysis. Finally, the anticipated median duration of follow-up in BIOVASC-Late will be 7  
10 years, which surpasses most contemporary observational studies of stroke patients.  
11

12  
13  
14  
15  
16  
17  
18 Our study has some limitations. Firstly, as this is a late follow-up study, the sample size is  
19 fixed, which means that the analyses for some secondary outcomes may be underpowered.  
20 Secondly, there are limitations to PET-CTA as a plaque-imaging modality, including its  
21 limited spatial resolution and inability to identify potentially relevant plaque features (eg.  
22 intraplaque hemorrhage or surface ulceration), which have been associated with stroke  
23 recurrence. Furthermore, <sup>18</sup>F-FDG PET use in clinical practice is limited by its availability in  
24 many centres, radiation exposure and high costs associated with its use. Nevertheless, it  
25 remains a valuable research tool for measuring FDG-uptake as a surrogate for vascular  
26 inflammation, which will help inform future clinical trials. Whilst its routine use in clinical  
27 practice cannot yet be recommended, the added prognostic value over traditional risk factors  
28 may guide therapy for clinicians and reduce vascular risk in patients. This may ultimately  
29 reduce or nullify the overall costs of its use in the clinical setting. Thirdly, as some patients  
30 will have died since recruitment, in-person evaluation will not be possible in these patients  
31 and adjudication of events will be limited to source documentation. This may lead to an  
32 under-detection or misclassification of outcomes. However, we expect that the utilization of  
33 multiple overlapping sources to identify late outcomes will minimise the risk of this  
34 happening. Finally, age and sex-specific variations in FDG-uptake, atherosclerotic plaque  
35 development, and clinical endpoints are increasingly recognised.<sup>(37)</sup> The majority of the  
36 patients in this study are older men (mean age 69.8 years, 68.4% male) and therefore this may  
37 limit the generalizability of our findings. However, any association between FDG-uptake and  
38 outcome will adjust for age and gender to mitigate against potential confounding.  
39  
40  
41  
42  
43  
44  
45  
46  
47  
48  
49  
50  
51  
52  
53

54  
55 Whilst these limitations need to be borne in mind, BIOVASC-Late will help answer  
56 important questions regarding the long-term association between vascular inflammation  
57  
58  
59  
60

1  
2  
3 (measured using  $^{18}\text{F}$ -FDG PET and circulating inflammatory cytokines) and recurrent major  
4 vascular events in stroke patients.  
5  
6

## 7 8 **COLLABORATION**

9  
10 Access to the primary data will be made available on request to the corresponding author  
11 after final publication of the study findings. We also encourage collaboration with other  
12 investigators and will consider any reasonable request for data sharing initiatives to improve  
13 research in the field.  
14  
15  
16

## 17 18 **FURTHER DETAILS**

### 19 20 **Ethics approval and consent to participate**

21  
22 This study has received ethical approval by the Institutional Review Boards of the participating  
23 hospital sites. Recruited patients provided written informed consent at enrolment. We plan to  
24 publish the findings of BIOVASC-Late in peer-reviewed journals and at international  
25 conferences appropriate to the field of research.  
26  
27  
28  
29  
30

### 31 32 **Funding**

33  
34 This study is supported by a Clinician Scientist Award grant received from the Health  
35 Research Board Ireland. The funding body did not contribute to the design of the study,  
36 collection, analysis or interpretation of data, or in the writing of this manuscript.  
37  
38  
39  
40

### 41 42 **Consent for publication**

43  
44 All authors have seen and approved the final version of the manuscript.  
45  
46

### 47 48 **Data availability**

49  
50 The authors will consider any reasonable request for data sharing.  
51  
52

### 53 54 **Acknowledgments**

55  
56 All Stroke Clinical Trials Network Ireland (SCTNI) collaborators.  
57  
58

### 59 60 **Competing Interests**

1  
2  
3  
4 Dr. Kelly receives funding from Health Research Board Ireland Clinician Scientist and Clinical  
5 Trials Network Awards, and the Irish Heart Foundation. Dr. Williams receives funding from  
6 the Health Research Board of Ireland.  
7  
8  
9

### 10 **List of abbreviations**

11  
12  
13  $^{18}\text{F}$ -fluorodeoxyglucose,  $^{18}\text{F}$ -FDG; Positron emission tomography, PET; Biomarkers Imaging  
14 Vulnerable Atherosclerosis in Symptomatic Carotid disease, BIOVASC; Dublin Carotid  
15 Atherosclerosis Study, DUCASS; Transient ischaemic attack, TIA; Computerised  
16 Tomography Angiography, CTA; C-reactive Protein, CRP; standardized uptake value,  
17  $\text{SUV}_{\text{max}}$ ; tissue-to-background ratio, TBR; Monocyte-chemoattractant protein-1, MCP-1;  
18 myocardial infarction, MI; modified Rankin Scale, mRS; magnetic resonance angiogram,  
19 MRA; magnetic resonance imaging, MRI; National Institute for Health Stroke Scale, NIHSS;  
20 Standard Occupational Classification, SOS; Hospital Anxiety Depression Scale, HADS;  
21 Interleukin-1 $\beta$ , IL-1 $\beta$ ; Interleukin-6, IL-6; Interleukin-8, IL-8, Interleukin-10, IL10;  
22 Interleukin-12p70, IL-12p70; Interferon- $\gamma$ , IFN- $\gamma$ ; Tumour Necrosis Factor- $\alpha$ , TNF- $\alpha$ ;  
23 millimoles per litre, mmol/L; Megabecquerel, MBq; Standardised uptake value, SUV;  
24 grammes, g; millilitre, ml; Food and Drug Administration, FDA; Electrocardiogram, ECG;  
25 Stroke Clinical Trials Network Ireland, SCTNI; Patient-public involvement, PPI.  
26  
27  
28  
29  
30  
31  
32  
33  
34  
35  
36  
37

### 38 **Authors' contributions**

39  
40  
41 JJM contributed to study design, data acquisition and manuscript preparation. NG contributed  
42 to the study design, data acquisition, data analysis and manuscript preparation. JPM planned  
43 the study design, contributed to the acquisition of data, led the imaging data analysis, and  
44 contributed to data management and manuscript preparation. SM contributed to study design,  
45 data acquisition, study conduct and manuscript preparation. MB contributed to the study  
46 design, data acquisition, and manuscript preparation. TC contributed to the study design, data  
47 acquisition, and manuscript preparation. SCron contributed to the study design, study  
48 conduct, data acquisition and manuscript preparation. ED contributed to the study design,  
49 conduct of the study, data acquisition, and manuscript preparation. SF planned the study  
50 design, contributed to the acquisition of data, contributed to imaging data analysis, and  
51 manuscript preparation. JH contributed to the study design, conduct of the study, data  
52  
53  
54  
55  
56  
57  
58  
59  
60

1  
2  
3 acquisition, and manuscript preparation. SCov contributed to the study design, data  
4 acquisition, and manuscript preparation. SCol contributed to data acquisition and manuscript  
5 preparation. GH contributed to the study design, conduct of the study, data acquisition, data  
6 management, outcome assessment, and manuscript preparation. EK contributed to the study  
7 design, data acquisition, and manuscript preparation. CM contributed to the study design,  
8 conduct of the study, data acquisition, and manuscript preparation. DJW contributed to the  
9 study design, conduct of the study, data acquisition, and manuscript preparation. MOC  
10 contributed to the study design, oversight of study PET procedures, data acquisition, data  
11 analysis, and manuscript preparation. MM planned the study design and contributed to data  
12 acquisition, data analysis and manuscript preparation. PJK is the principal investigator of the  
13 BIOVASC and DUCASS Studies, planned the study design and contributed to data  
14 acquisition, data analysis, outcome adjudication and manuscript preparation. All authors read  
15 and approved the final manuscript.  
16  
17  
18  
19  
20  
21  
22  
23  
24  
25  
26  
27  
28  
29  
30  
31  
32  
33  
34  
35  
36  
37  
38  
39  
40  
41  
42  
43  
44  
45  
46  
47  
48  
49  
50  
51  
52  
53  
54  
55  
56  
57  
58  
59  
60

## References

1. Collaborators GBDS. Global, regional, and national burden of stroke, 1990-2016: a systematic analysis for the Global Burden of Disease Study 2016. *Lancet Neurol.* 2019.
2. Boulanger M, Bejot Y, Rothwell PM, Touze E. Long-Term Risk of Myocardial Infarction Compared to Recurrent Stroke After Transient Ischemic Attack and Ischemic Stroke: Systematic Review and Meta-Analysis. *J Am Heart Assoc.* 2018;7(2).
3. Marnane M, Prendeville S, McDonnell C, Noone I, Barry M, Crowe M, et al. Plaque inflammation and unstable morphology are associated with early stroke recurrence in symptomatic carotid stenosis. *Stroke.* 2014;45(3):801-6.
4. Redgrave JNE, Lovett JK, Gallagher PJ, Rothwell PM. Histological assessment of 526 symptomatic carotid plaques in relation to the nature and timing of ischemic symptoms - The Oxford plaque study. *Circulation.* 2006;113(19):2320-8.
5. Libby P. Inflammation in atherosclerosis. *Nature.* 2002;420(6917):868-74.
6. Tardif JC, Kouz S, Waters DD, Bertrand OF, Diaz R, Maggioni AP, et al. Efficacy and Safety of Low-Dose Colchicine after Myocardial Infarction. *N Engl J Med.* 2019.
7. Nidorf SM, Eikelboom JW, Budgeon CA, Thompson PL. Low-dose colchicine for secondary prevention of cardiovascular disease. *J Am Coll Cardiol.* 2013;61(4):404-10.
8. Ridker PM, Everett BM, Thuren T, MacFadyen JG, Chang WH, Ballantyne C, et al. Antiinflammatory Therapy with Canakinumab for Atherosclerotic Disease. *New Engl J Med.* 2017;377(12):1119-31.
9. Ridker PM, Everett BM, Pradhan A, MacFadyen JG, Solomon DH, Zaharris E, et al. Low-Dose Methotrexate for the Prevention of Atherosclerotic Events. *N Engl J Med.* 2019;380(8):752-62.
10. Cocker MS, Spence JD, Hammond R, deKemp RA, Lum C, Wells G, et al. [18F]-Fluorodeoxyglucose PET/CT imaging as a marker of carotid plaque inflammation: Comparison to immunohistology and relationship to acuity of events. *Int J Cardiol.* 2018;271:378-86.
11. Rudd JH, Warburton EA, Fryer TD, Jones HA, Clark JC, Antoun N, et al. Imaging atherosclerotic plaque inflammation with [18F]-fluorodeoxyglucose positron emission tomography. *Circulation.* 2002;105(23):2708-11.
12. Rudd JH, Myers KS, Bansilal S, Machac J, Woodward M, Fuster V, et al. Relationships among regional arterial inflammation, calcification, risk factors, and biomarkers: a prospective fluorodeoxyglucose positron-emission tomography/computed tomography imaging study. *Circ Cardiovasc Imaging.* 2009;2(2):107-15.
13. Figueroa AL, Abdelbaky A, Truong QA, Corsini E, MacNabb MH, Lavender ZR, et al. Measurement of arterial activity on routine FDG PET/CT images improves prediction of risk of future CV events. *JACC Cardiovasc Imaging.* 2013;6(12):1250-9.
14. Moon SH, Cho YS, Noh TS, Choi JY, Kim BT, Lee KH. Carotid FDG Uptake Improves Prediction of Future Cardiovascular Events in Asymptomatic Individuals. *JACC Cardiovasc Imaging.* 2015;8(8):949-56.
15. Emerging Risk Factors C, Kaptoge S, Di Angelantonio E, Lowe G, Pepys MB, Thompson SG, et al. C-reactive protein concentration and risk of coronary heart disease, stroke, and mortality: an individual participant meta-analysis. *Lancet.* 2010;375(9709):132-40.

16. Fibrinogen Studies C, Danesh J, Lewington S, Thompson SG, Lowe GD, Collins R, et al. Plasma fibrinogen level and the risk of major cardiovascular diseases and nonvascular mortality: an individual participant meta-analysis. *JAMA*. 2005;294(14):1799-809.
17. Georgakis MK, Malik R, Bjorkbacka H, Pana TA, Demissie S, Ayers C, et al. Circulating Monocyte Chemoattractant Protein-1 and Risk of Stroke: Meta-Analysis of Population-Based Studies Involving 17 180 Individuals. *Circ Res*. 2019;125(8):773-82.
18. Elkind MS, Luna JM, McClure LA, Zhang Y, Coffey CS, Roldan A, et al. C-reactive protein as a prognostic marker after lacunar stroke: levels of inflammatory markers in the treatment of stroke study. *Stroke*. 2014;45(3):707-16.
19. Li J, Zhao X, Meng X, Lin J, Liu L, Wang C, et al. High-Sensitive C-Reactive Protein Predicts Recurrent Stroke and Poor Functional Outcome: Subanalysis of the Clopidogrel in High-Risk Patients With Acute Nondisabling Cerebrovascular Events Trial. *Stroke*. 2016;47(8):2025-30.
20. Rothwell PM, Howard SC, Power DA, Gutnikov SA, Algra A, van Gijn J, et al. Fibrinogen concentration and risk of ischemic stroke and acute coronary events in 5113 patients with transient ischemic attack and minor ischemic stroke. *Stroke*. 2004;35(10):2300-5.
21. Castillo J, Alvarez-Sabin J, Martinez-Vila E, Montaner J, Sobrino T, Vivancos J, et al. Inflammation markers and prediction of post-stroke vascular disease recurrence: the MITICO study. *Journal of Neurology*. 2009;256(2):217-24.
22. Boehme AK, McClure LA, Zhang Y, Luna JM, Del Brutto OH, Benavente OR, et al. Inflammatory Markers and Outcomes After Lacunar Stroke: Levels of Inflammatory Markers in Treatment of Stroke Study. *Stroke*. 2016;47(3):659-67.
23. Welsh P, Lowe GD, Chalmers J, Campbell DJ, Rumley A, Neal BC, et al. Associations of proinflammatory cytokines with the risk of recurrent stroke. *Stroke*. 2008;39(8):2226-30.
24. Boellaard R, O'Doherty MJ, Weber WA, Mottaghy FM, Lonsdale MN, Stroobants SG, et al. FDG PET and PET/CT: EANM procedure guidelines for tumour PET imaging: version 1.0. *Eur J Nucl Med Mol Imaging*. 2010;37(1):181-200.
25. Giannotti N, O'Connell MJ, Foley SJ, Kelly PJ, McNulty JP. Carotid atherosclerotic plaques standardised uptake values: software challenges and reproducibility. *EJNMMI Res*. 2017;7(1):39.
26. Bucerius J, Hyafil F, Verberne HJ, Slart RH, Lindner O, Sciagra R, et al. Position paper of the Cardiovascular Committee of the European Association of Nuclear Medicine (EANM) on PET imaging of atherosclerosis. *Eur J Nucl Med Mol Imaging*. 2016;43(4):780-92.
27. Tawakol A, Fayad ZA, Mogg R, Alon A, Klimas MT, Dansky H, et al. Intensification of statin therapy results in a rapid reduction in atherosclerotic inflammation: results of a multicenter fluorodeoxyglucose-positron emission tomography/computed tomography feasibility study. *J Am Coll Cardiol*. 2013;62(10):909-17.
28. Johnsrud K, Skagen K, Seierstad T, Skjelland M, Russell D, Revheim ME. (18)F-FDG PET/CT for the quantification of inflammation in large carotid artery plaques. *J Nucl Cardiol*. 2019;26(3):883-93.
29. Bruno A, Shah N, Lin C, Close B, Hess DC, Davis K, et al. Improving modified Rankin Scale assessment with a simplified questionnaire. *Stroke*. 2010;41(5):1048-50.
30. Collin C, Wade DT, Davies S, Horne V. The Barthel ADL Index: a reliability study. *Int Disabil Stud*. 1988;10(2):61-3.
31. Thygesen K, Alpert JS, Jaffe AS, Simoons ML, Chaitman BR, White HD, et al. Third universal definition of myocardial infarction. *Circulation*. 2012;126(16):2020-35.

- 1  
2  
3  
4  
5  
6  
7  
8  
9  
10  
11  
12  
13  
14  
15  
16  
17  
18  
19  
20  
21  
22  
23  
24  
25  
26  
27  
28  
29  
30  
31  
32  
33  
34  
35  
36  
37  
38  
39  
40  
41  
42  
43  
44  
45  
46  
47  
48  
49  
50  
51  
52  
53  
54  
55  
56  
57  
58  
59  
60
32. Hicks KA, Mahaffey KW, Mehran R, Nissen SE, Wiviott SD, Dunn B, et al. 2017 Cardiovascular and Stroke Endpoint Definitions for Clinical Trials. *Circulation*. 2018;137(9):961-72.
33. Marnane M, Merwick A, Sheehan OC, Hannon N, Foran P, Grant T, et al. Carotid plaque inflammation on 18F-fluorodeoxyglucose positron emission tomography predicts early stroke recurrence. *Ann Neurol*. 2012;71(5):709-18.
34. Kelly PJ, Camps-Renom P, Giannotti N, Marti-Fabregas J, Murphy S, McNulty J, et al. Carotid Plaque Inflammation Imaged by (18)F-Fluorodeoxyglucose Positron Emission Tomography and Risk of Early Recurrent Stroke. *Stroke*. 2019;50(7):1766-73.
35. Kelly PJ, Camps-Renom P, Giannotti N, Marti-Fabregas J, McNulty JP, Baron JC, et al. A Risk Score Including Carotid Plaque Inflammation and Stenosis Severity Improves Identification of Recurrent Stroke. *Stroke*. 2020;51(3):838-45.
36. Kelly PJ, Murphy S, Coveney S, Purroy F, Lemmens R, Tsivgoulis G, et al. Anti-inflammatory approaches to ischaemic stroke prevention. *J Neurol Neurosurg Psychiatry*. 2018;89(2):211-8.
37. Man JJ, Beckman JA, Jaffe IZ. Sex as a Biological Variable in Atherosclerosis. *Circ Res*. 2020;126(9):1297-319.



1  
2  
3  
4  
5  
6  
7  
8  
9  
10  
11  
12  
13  
14  
15  
16  
17  
18  
19  
20  
21  
22  
23  
24  
25  
26  
27  
28  
29  
30  
31  
32  
33  
34  
35  
36  
37  
38  
39  
40  
41  
42  
43  
44  
45  
46  
47  
48  
49  
50  
51  
52  
53  
54  
55  
56  
57  
58  
59  
60

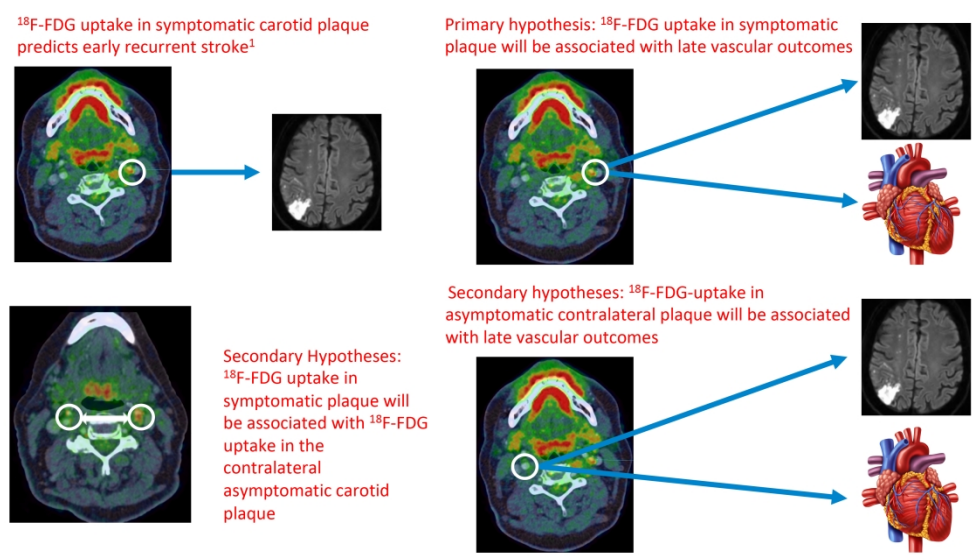

Figure 1: Schematic representation of the study hypotheses.

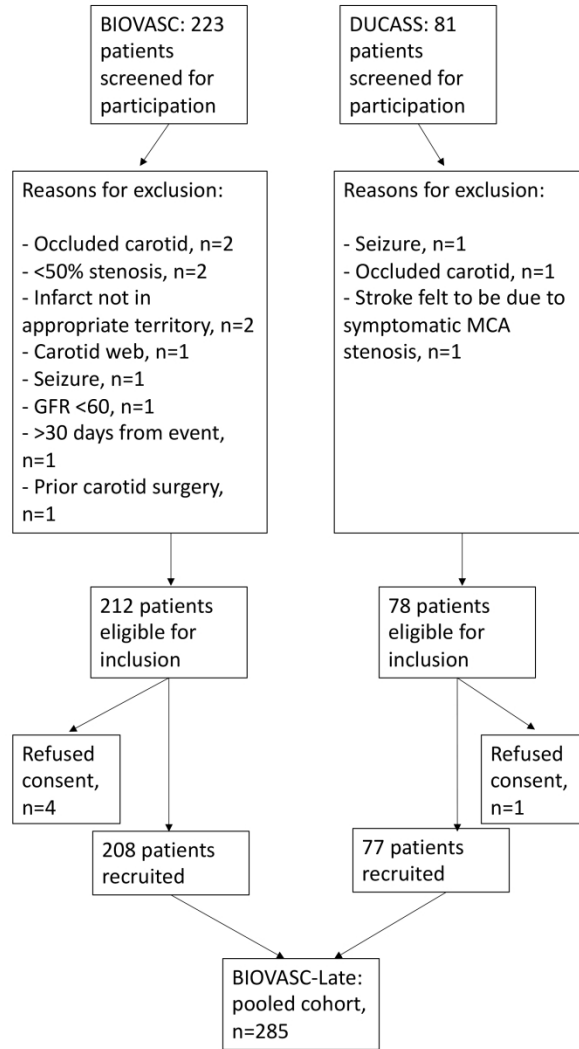

Figure 2: Flow diagram illustrating study screening, eligibility and enrollment.

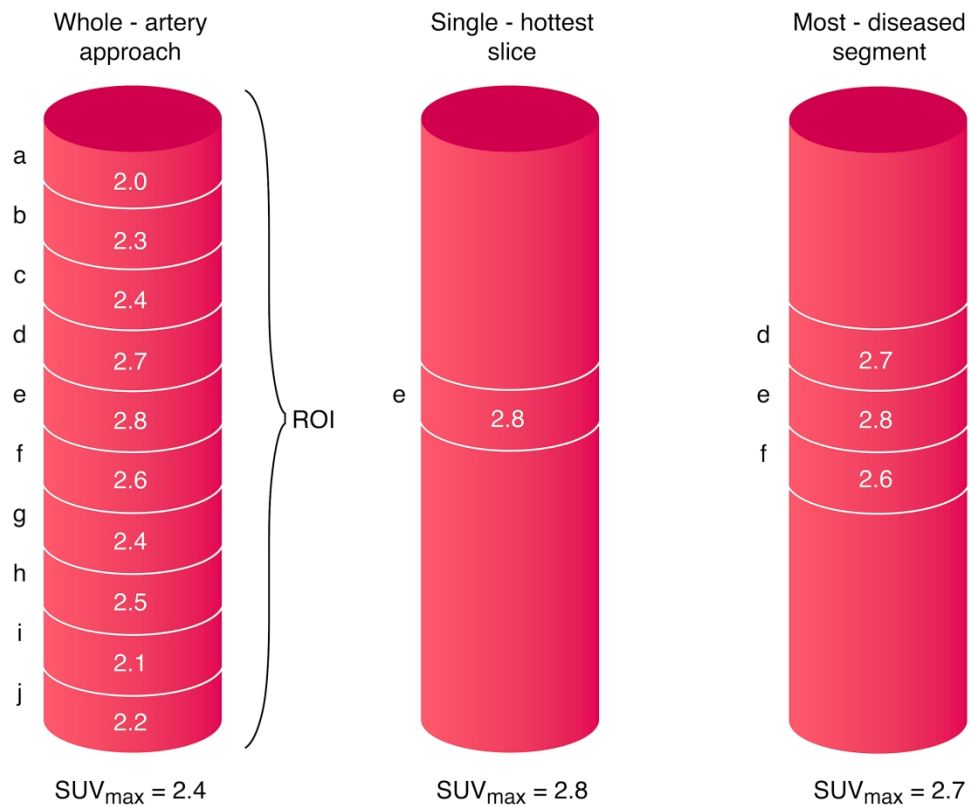

Figure 3: Schematic representation of 18-F-FDG PET-CTA image acquisition. 10 regions of interest (ROI) are defined as 1mm-thick slices above and below the area of maximal luminal narrowing in the symptomatic carotid artery. 30 ROI are defined superior to the carotid bifurcation in the contralateral asymptomatic carotid artery (not shown). 18-F-FDG uptake in the vessel wall is quantified using standardized uptake values (SUV [g/mL]) with the highest uptake in each slice defined as the SUV<sub>max</sub>. The whole-artery approach to measuring vessel inflammation calculates the average of the SUV<sub>max</sub> across the ROI  $(a+b+c+d+e+f+g+h+i+j/10)$ . The single hottest slice is defined as the axial slice with highest SUV<sub>max</sub> (slice 'e'). 18F-FDG-uptake in the most-diseased-segment (MDS) is taken as the average of the SUV<sub>max</sub> across 3 slices defined relative to the SHS  $(d+e+f/3)$ .

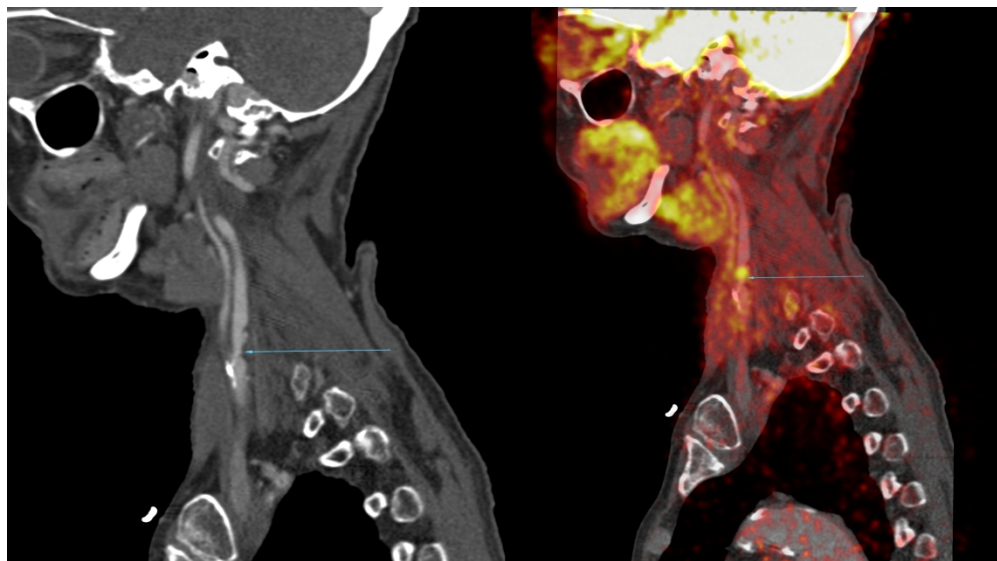

Figure 4(a) and 4(b): (a) CTA shows a moderate (~50%) stenosis of the left proximal internal carotid artery (blue arrow) in a recently symptomatic stroke patient presenting with right sided weakness and dysphasia. (b) Co-registered 18F-FDG PET-CTA of same patient shows increased focal FDG-uptake in the region of the carotid plaque.

1  
2  
3  
4  
5  
6  
7  
8  
9  
10  
11  
12  
13  
14  
15  
16  
17  
18  
19  
20  
21  
22  
23  
24  
25  
26  
27  
28  
29  
30  
31  
32  
33  
34  
35  
36  
37  
38  
39  
40  
41  
42  
43  
44  
45  
46  
47  
48  
49  
50  
51  
52  
53  
54  
55  
56  
57  
58  
59  
60

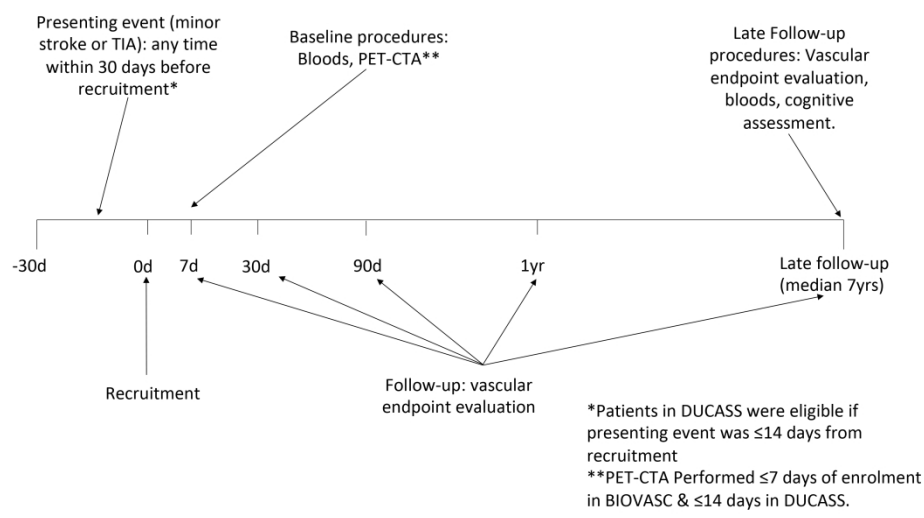

Figure 5: Schematic representation of timeline of BIOVASC-Late study.
